# Supplementary material
Source: ML conference proceedings conference paper supplement (https://openreview.net/forum?id=YWAJOiBn8B)

Communication Bits per Goal Location  
(Sorted by Goal Frequency)

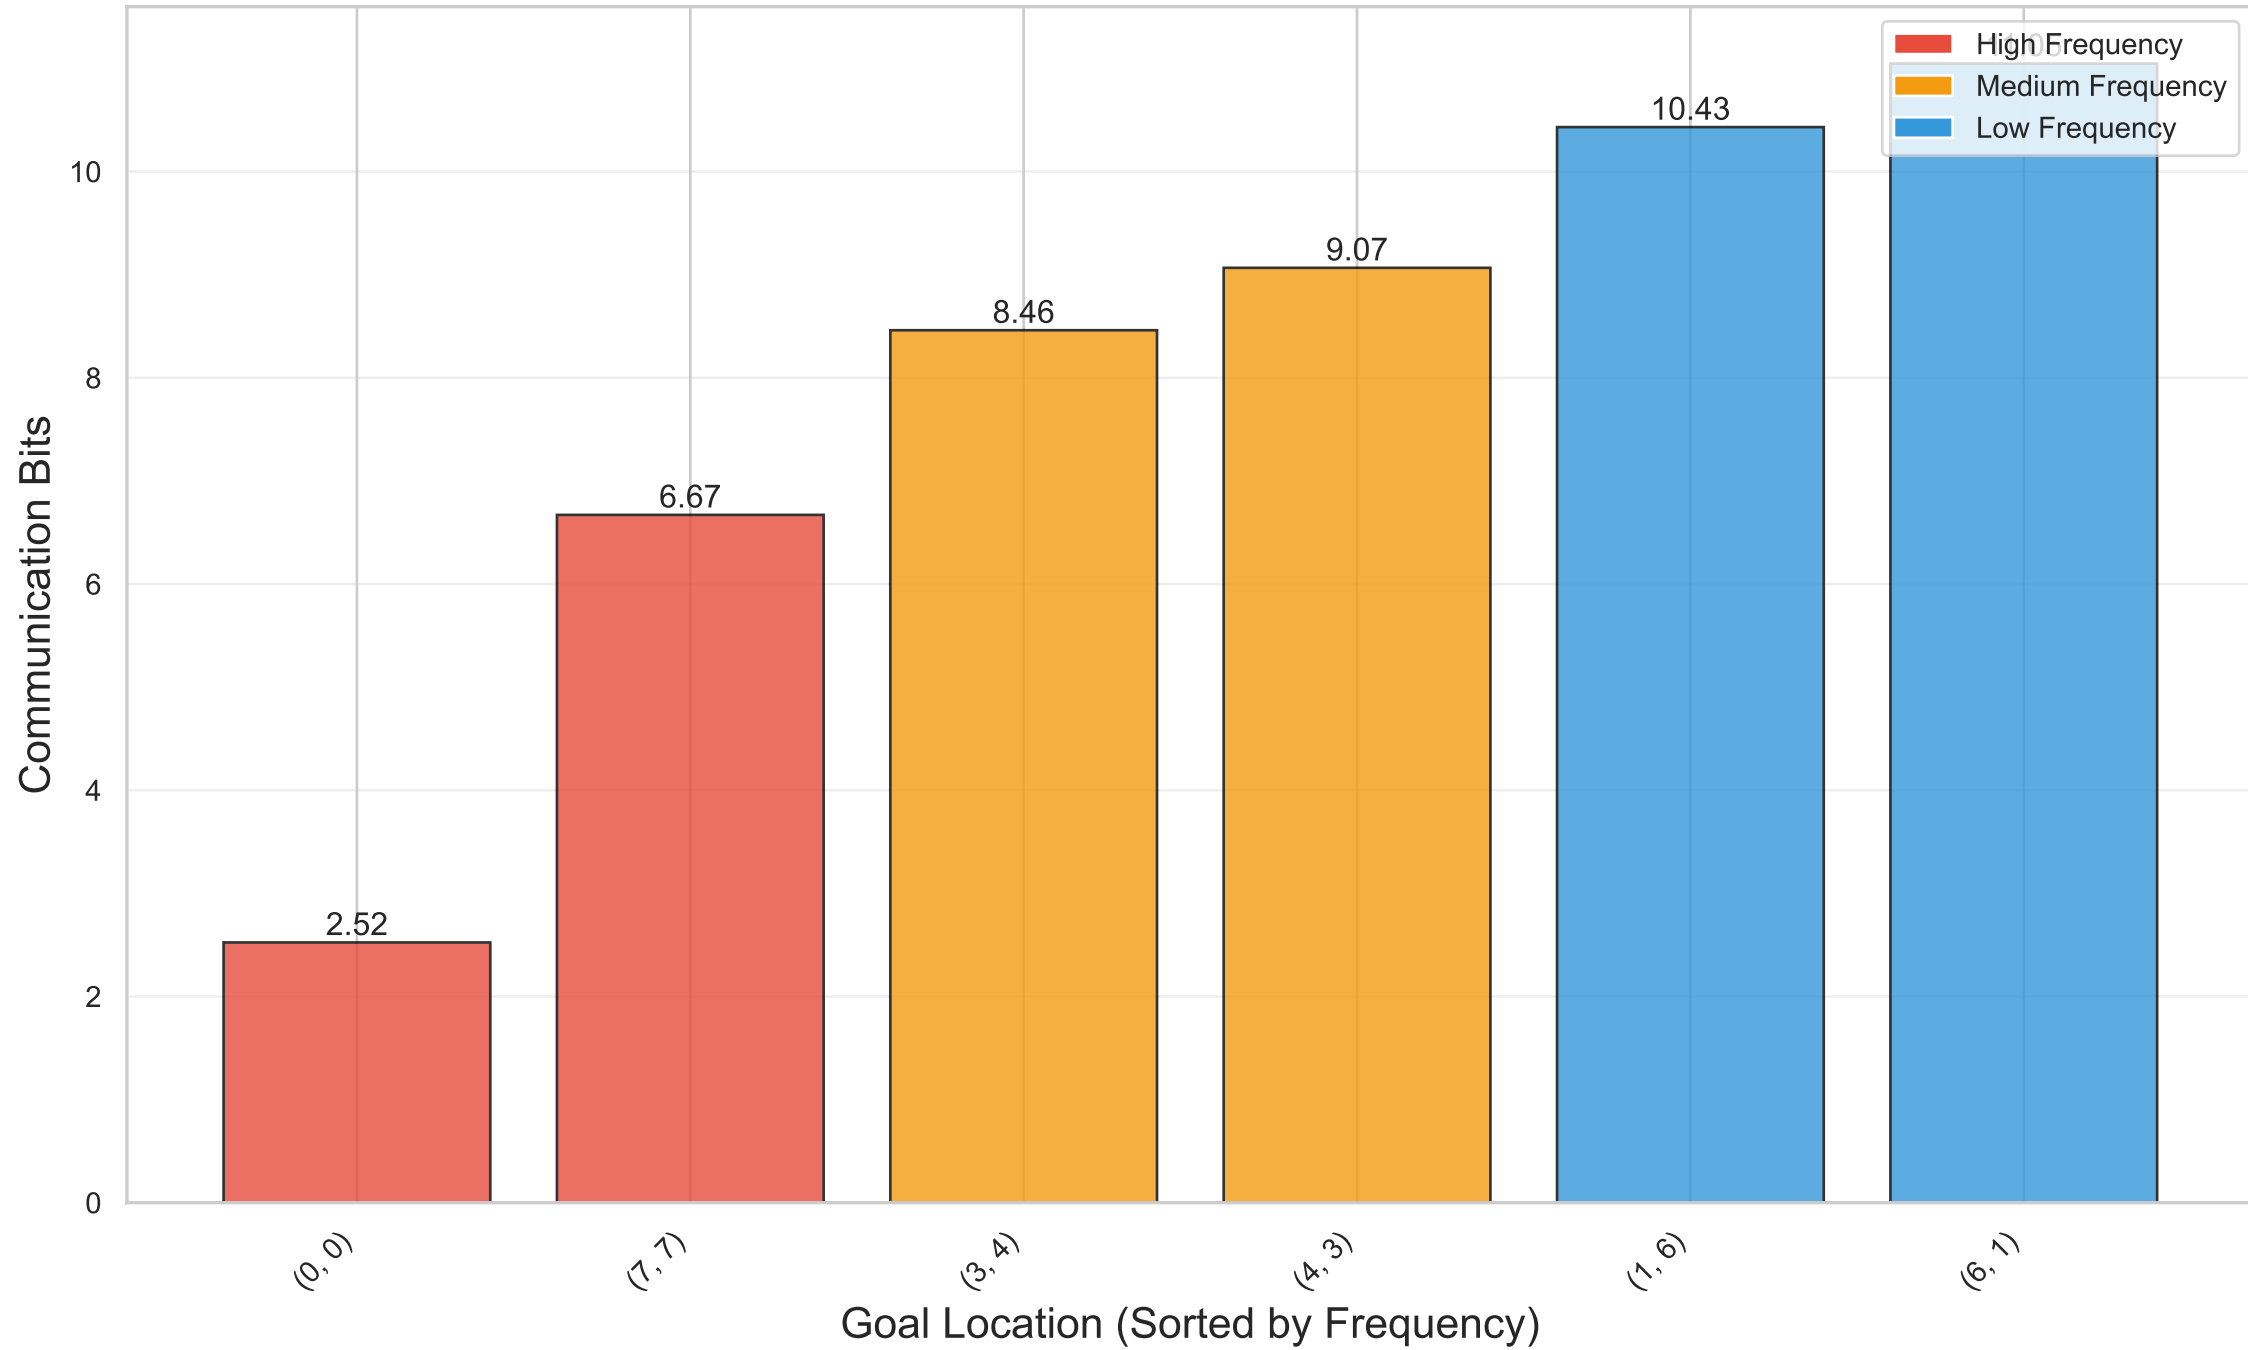

Supplement: supplementary_material [file bits_vs_frequency_barchart.pdf › Multi-Agent-Limited-Comms/ToyProblem/Good plots v1/bits_vs_frequency_barchart.pdf]

Distribution of Communication Bits Across All Goals

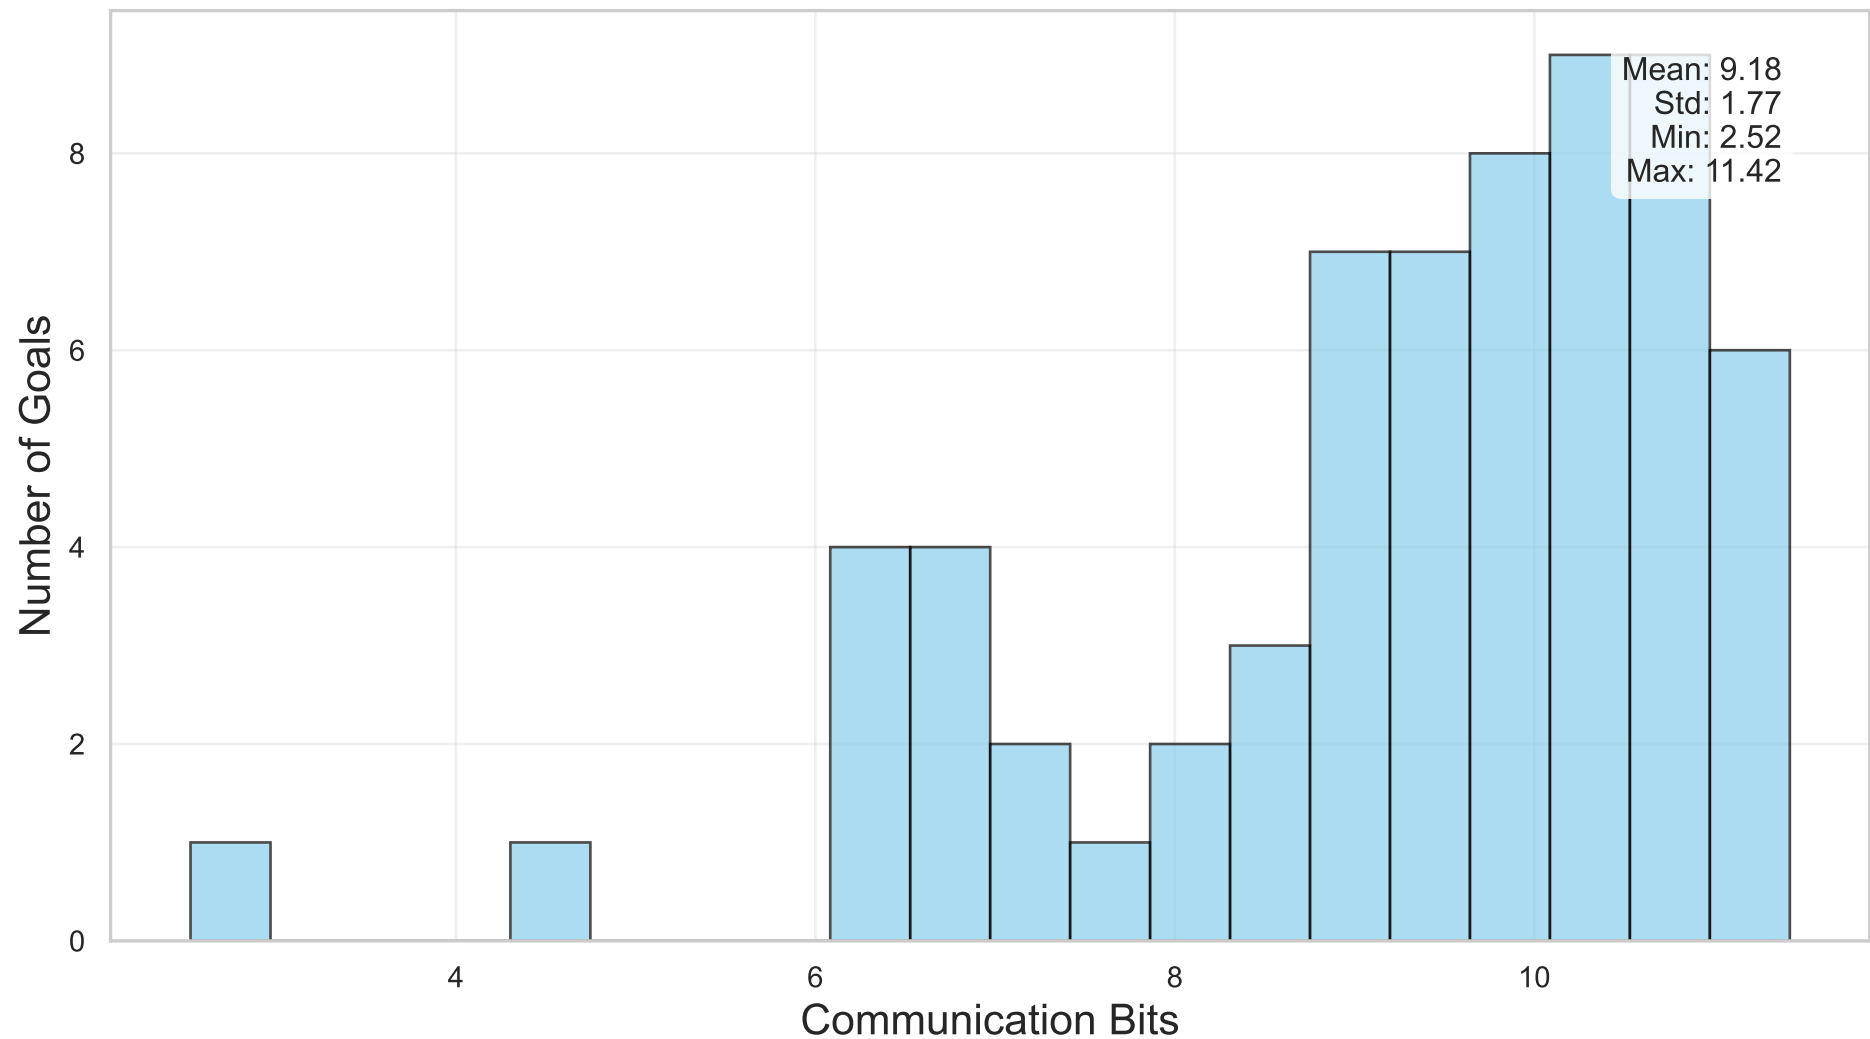

Supplement: supplementary_material [file communication_bits_distribution.pdf › Multi-Agent-Limited-Comms/ToyProblem/Good plots v1/communication_bits_distribution.pdf]

# Communication Bits: Goal Positions vs Non-Goal Positions

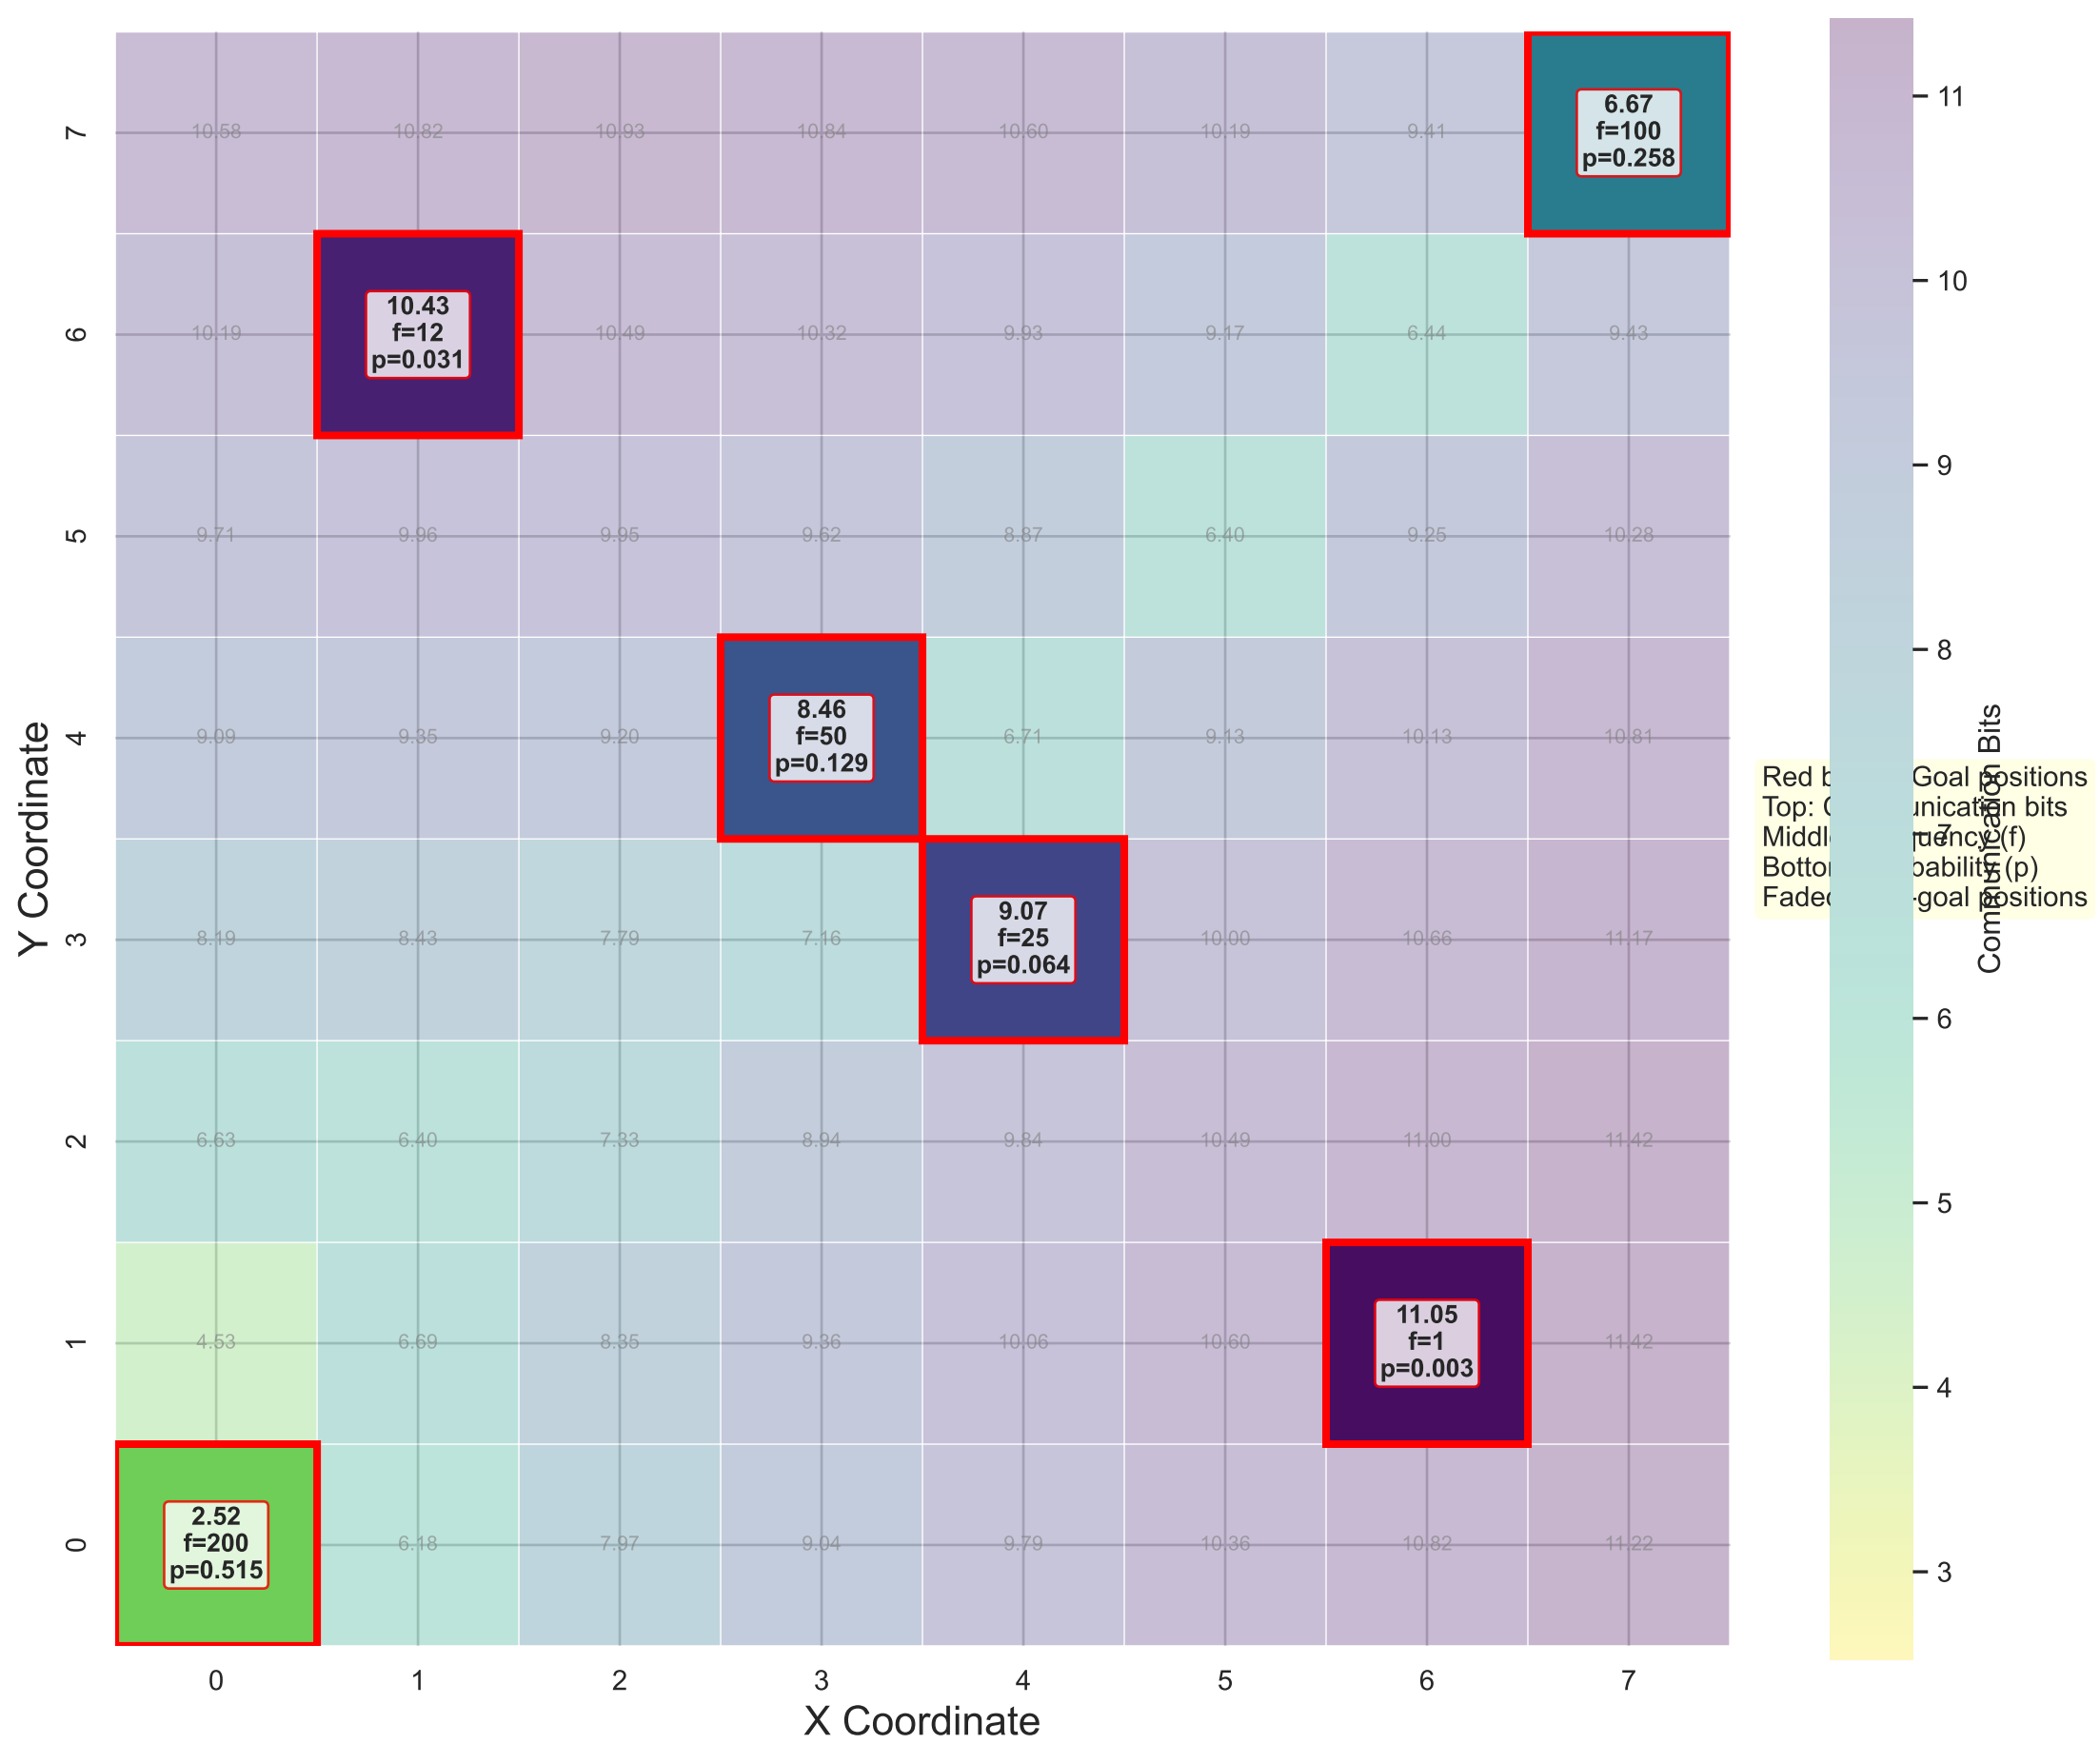

Supplement: supplementary_material [file communication_bits_heatmap.pdf › Multi-Agent-Limited-Comms/ToyProblem/Good plots v1/communication_bits_heatmap.pdf]

Communication Bits vs Goal Frequency  
(Correlation:  $r = -0.994$ )

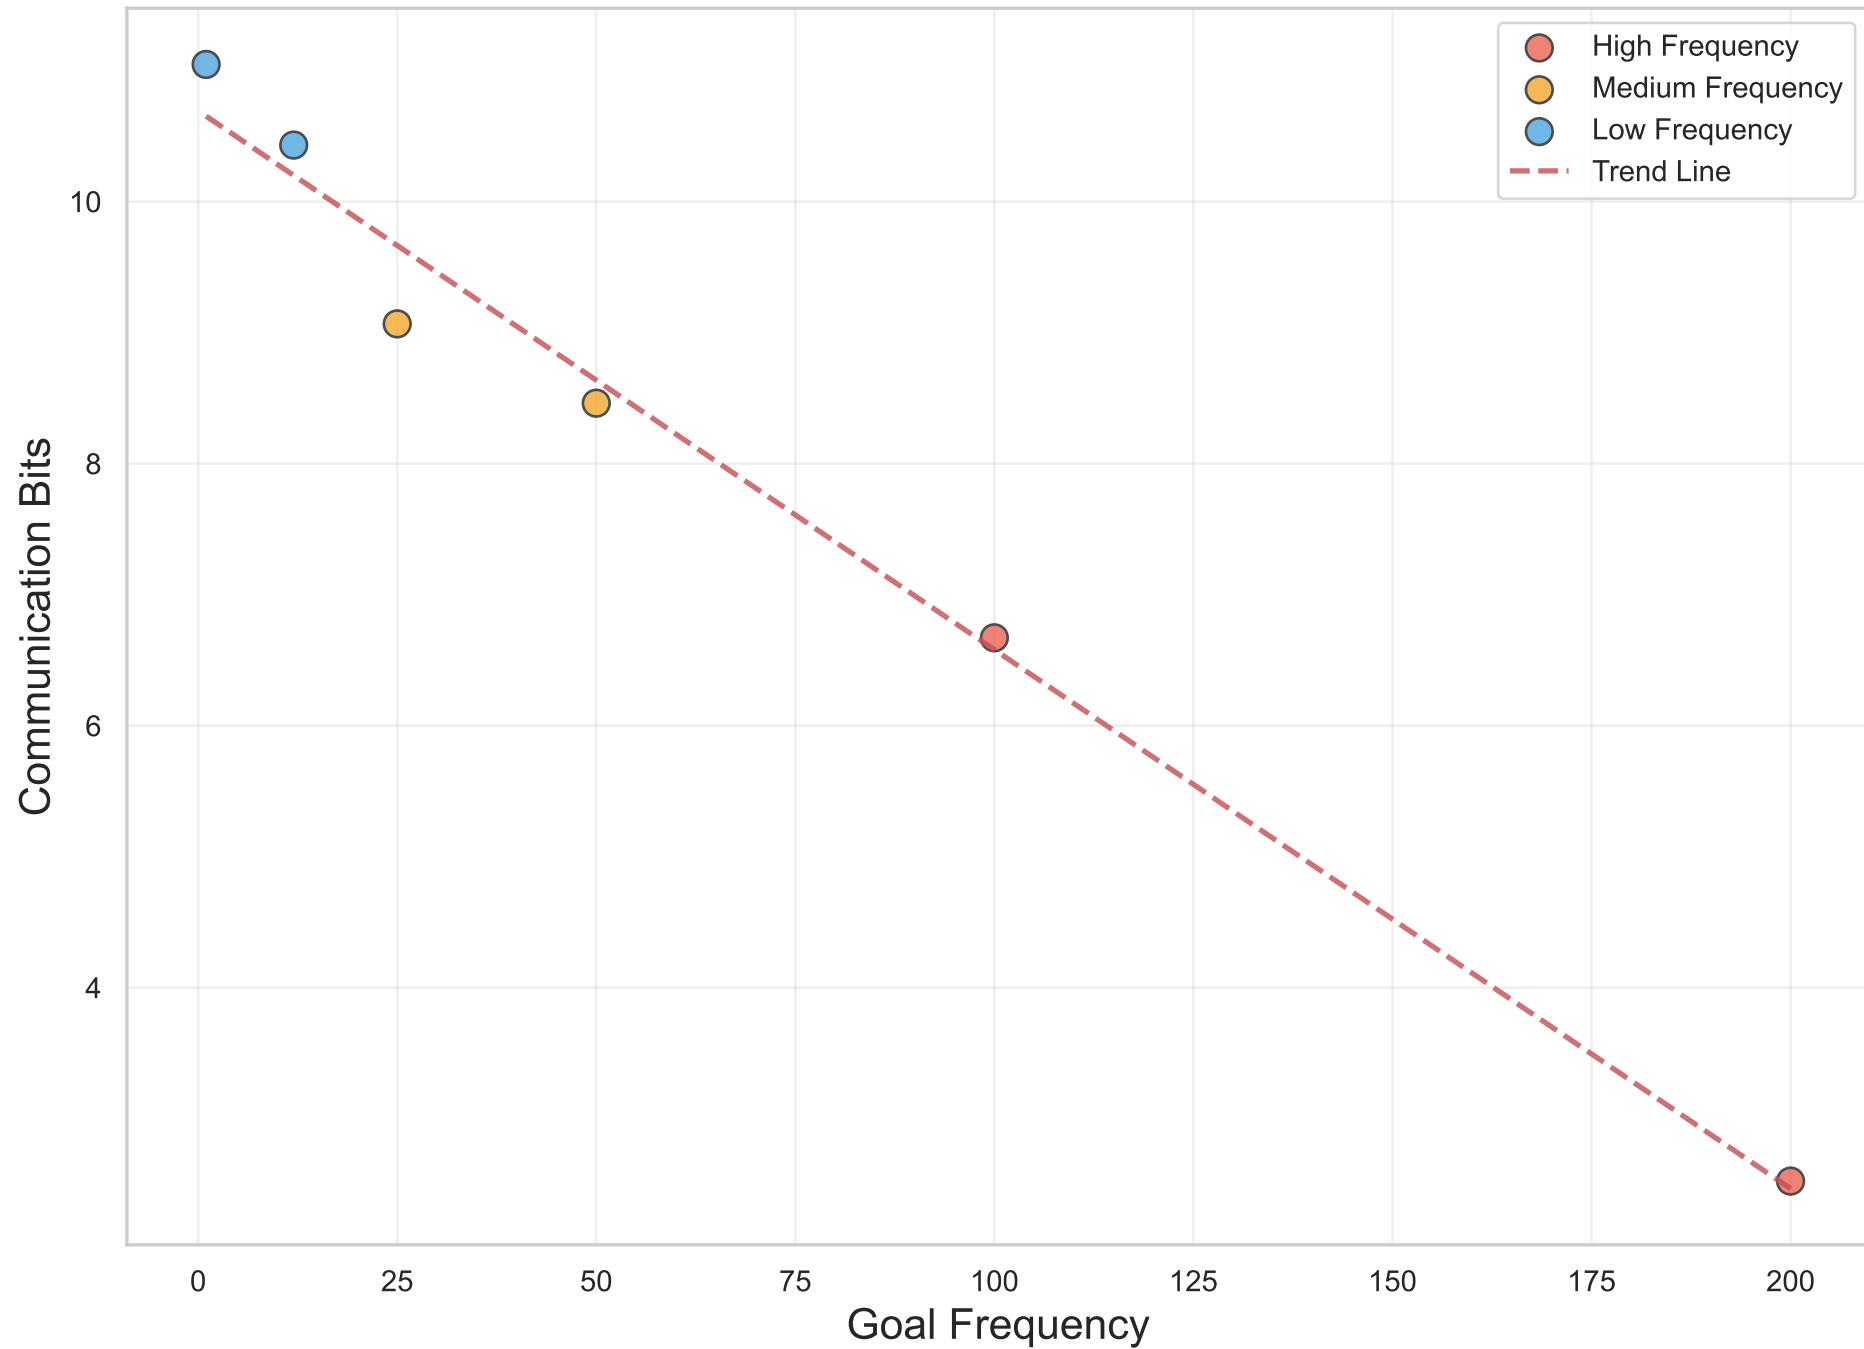

Supplement: supplementary_material [file frequency_cost_correlation.pdf › Multi-Agent-Limited-Comms/ToyProblem/Good plots v1/frequency_cost_correlation.pdf]

# Goal Position Analysis

## Communication Bits (All Positions)

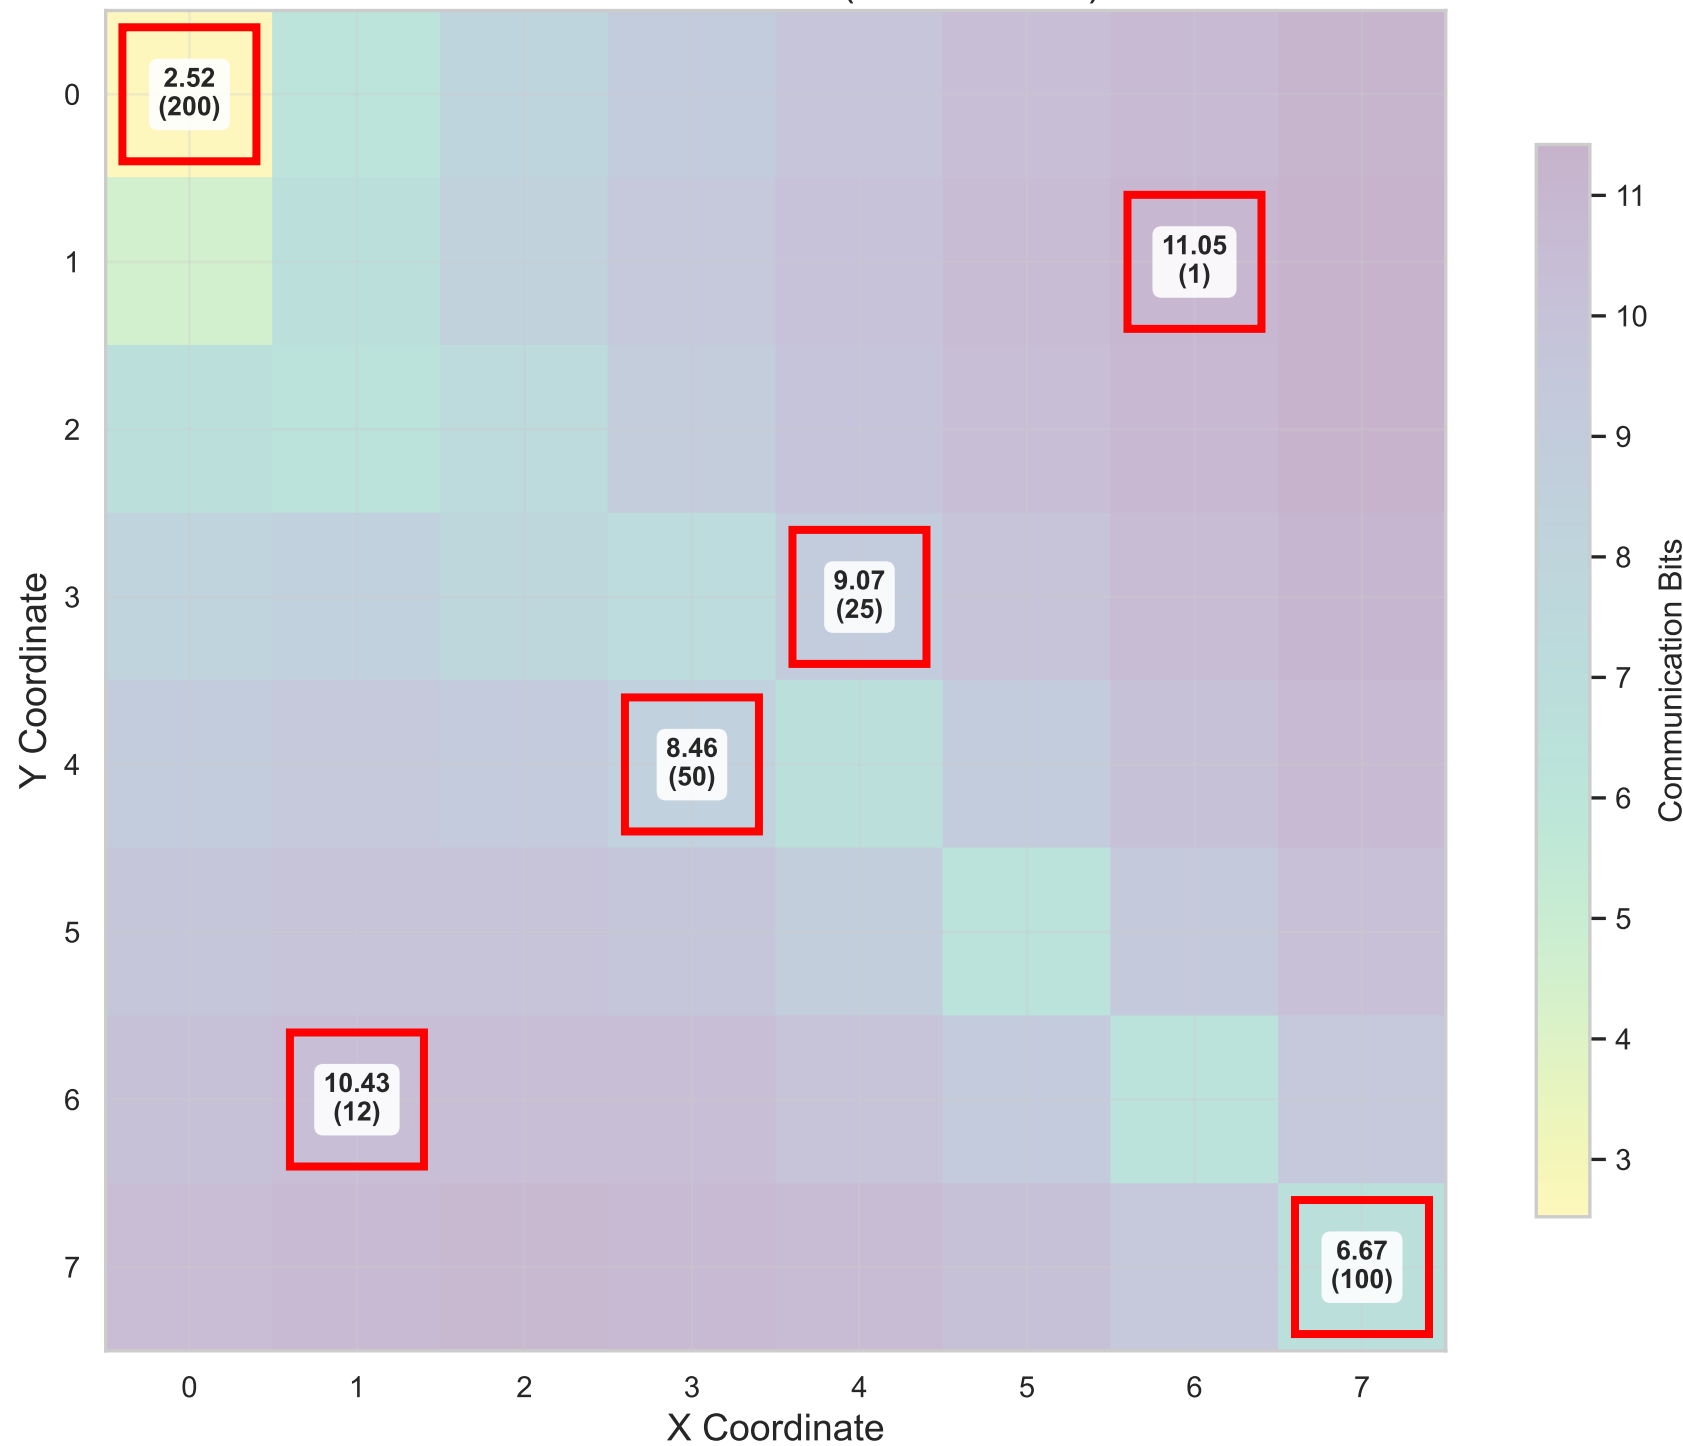

## Goal Sampling Probabilities

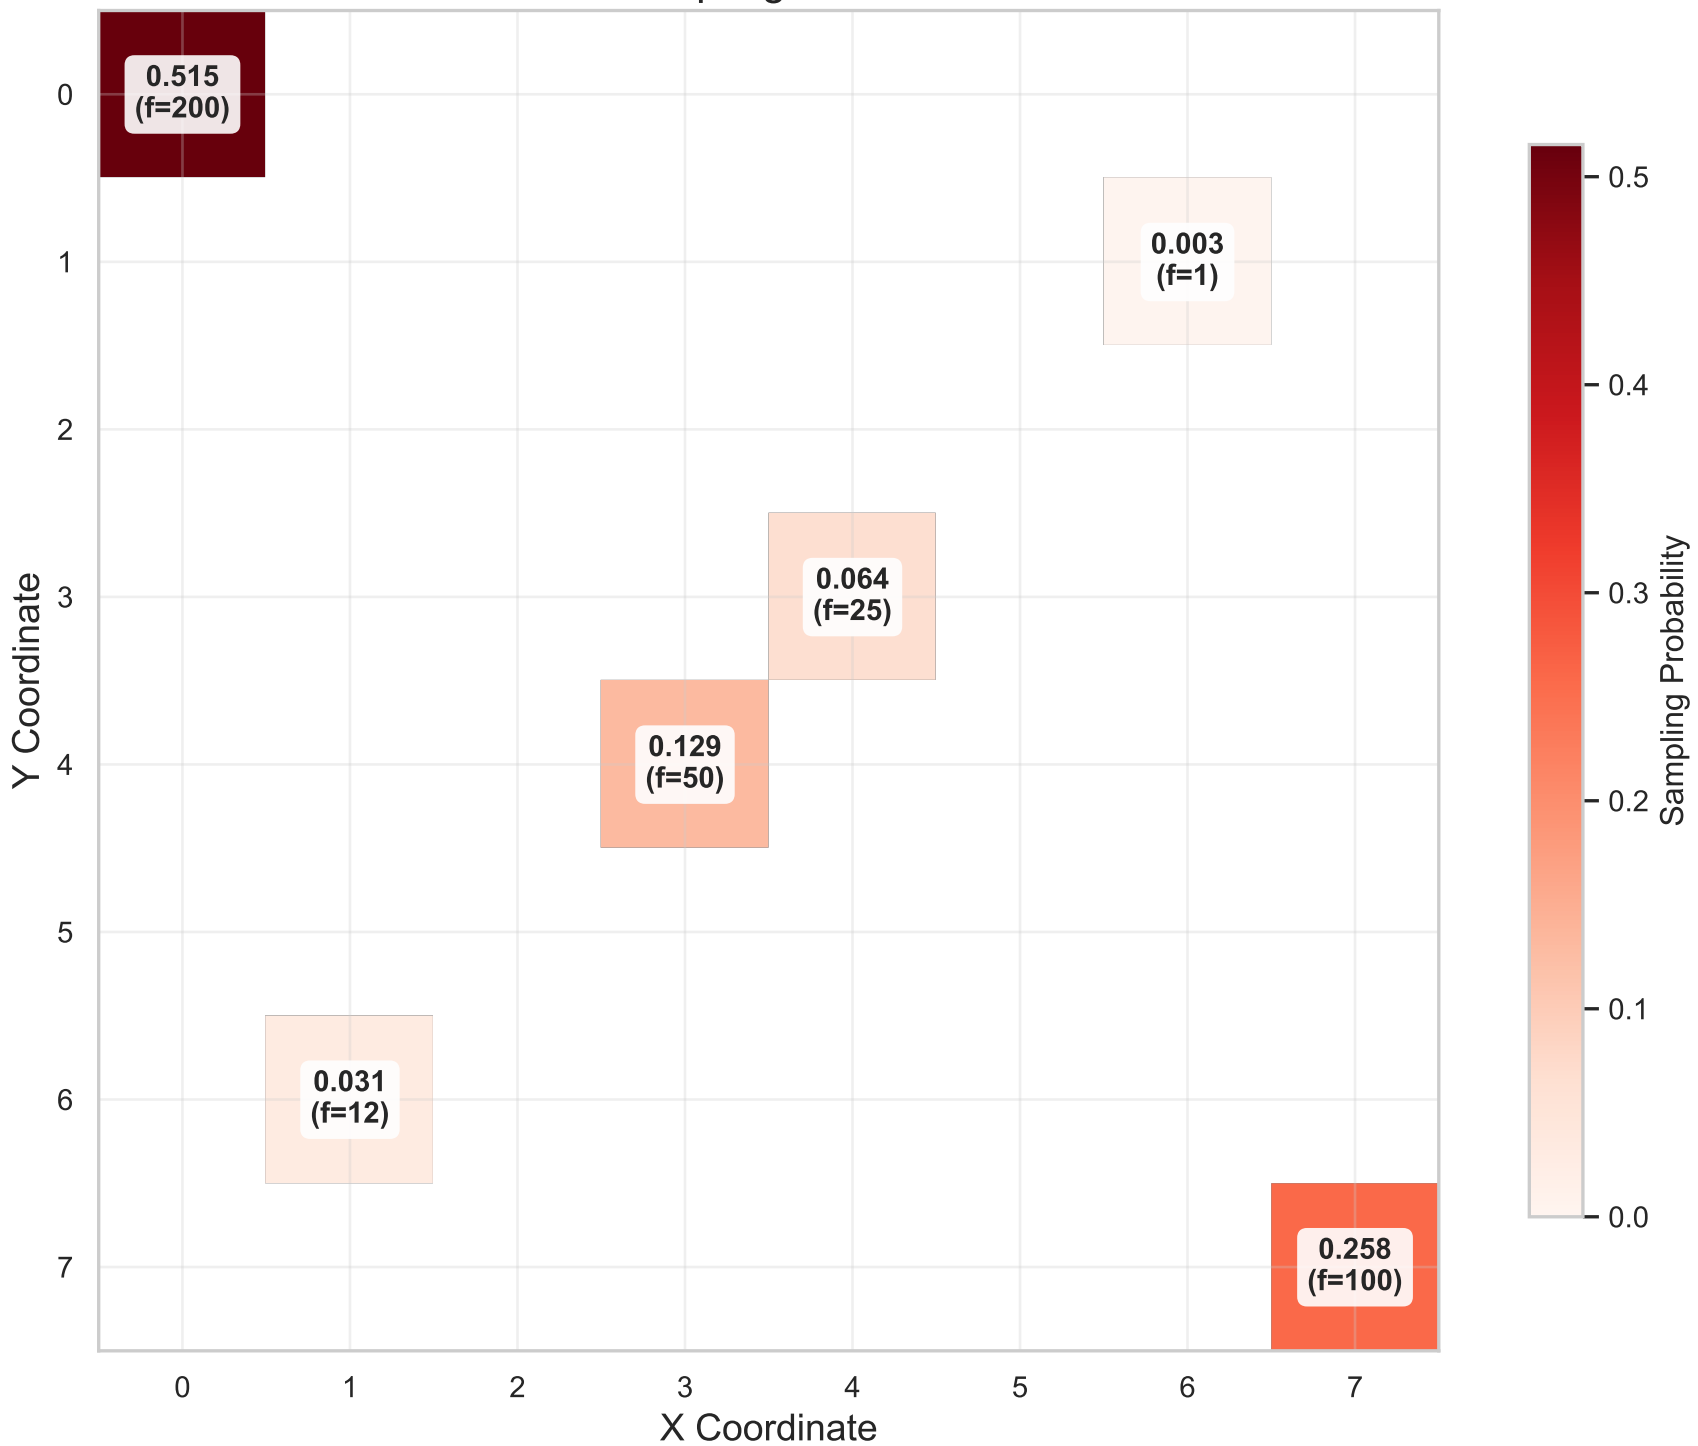

Supplement: supplementary_material [file goal_analysis_comparison.pdf › Multi-Agent-Limited-Comms/ToyProblem/Good plots v1/goal_analysis_comparison.pdf]

Communication Bits per Goal Location  
(Sorted by Goal Frequency)

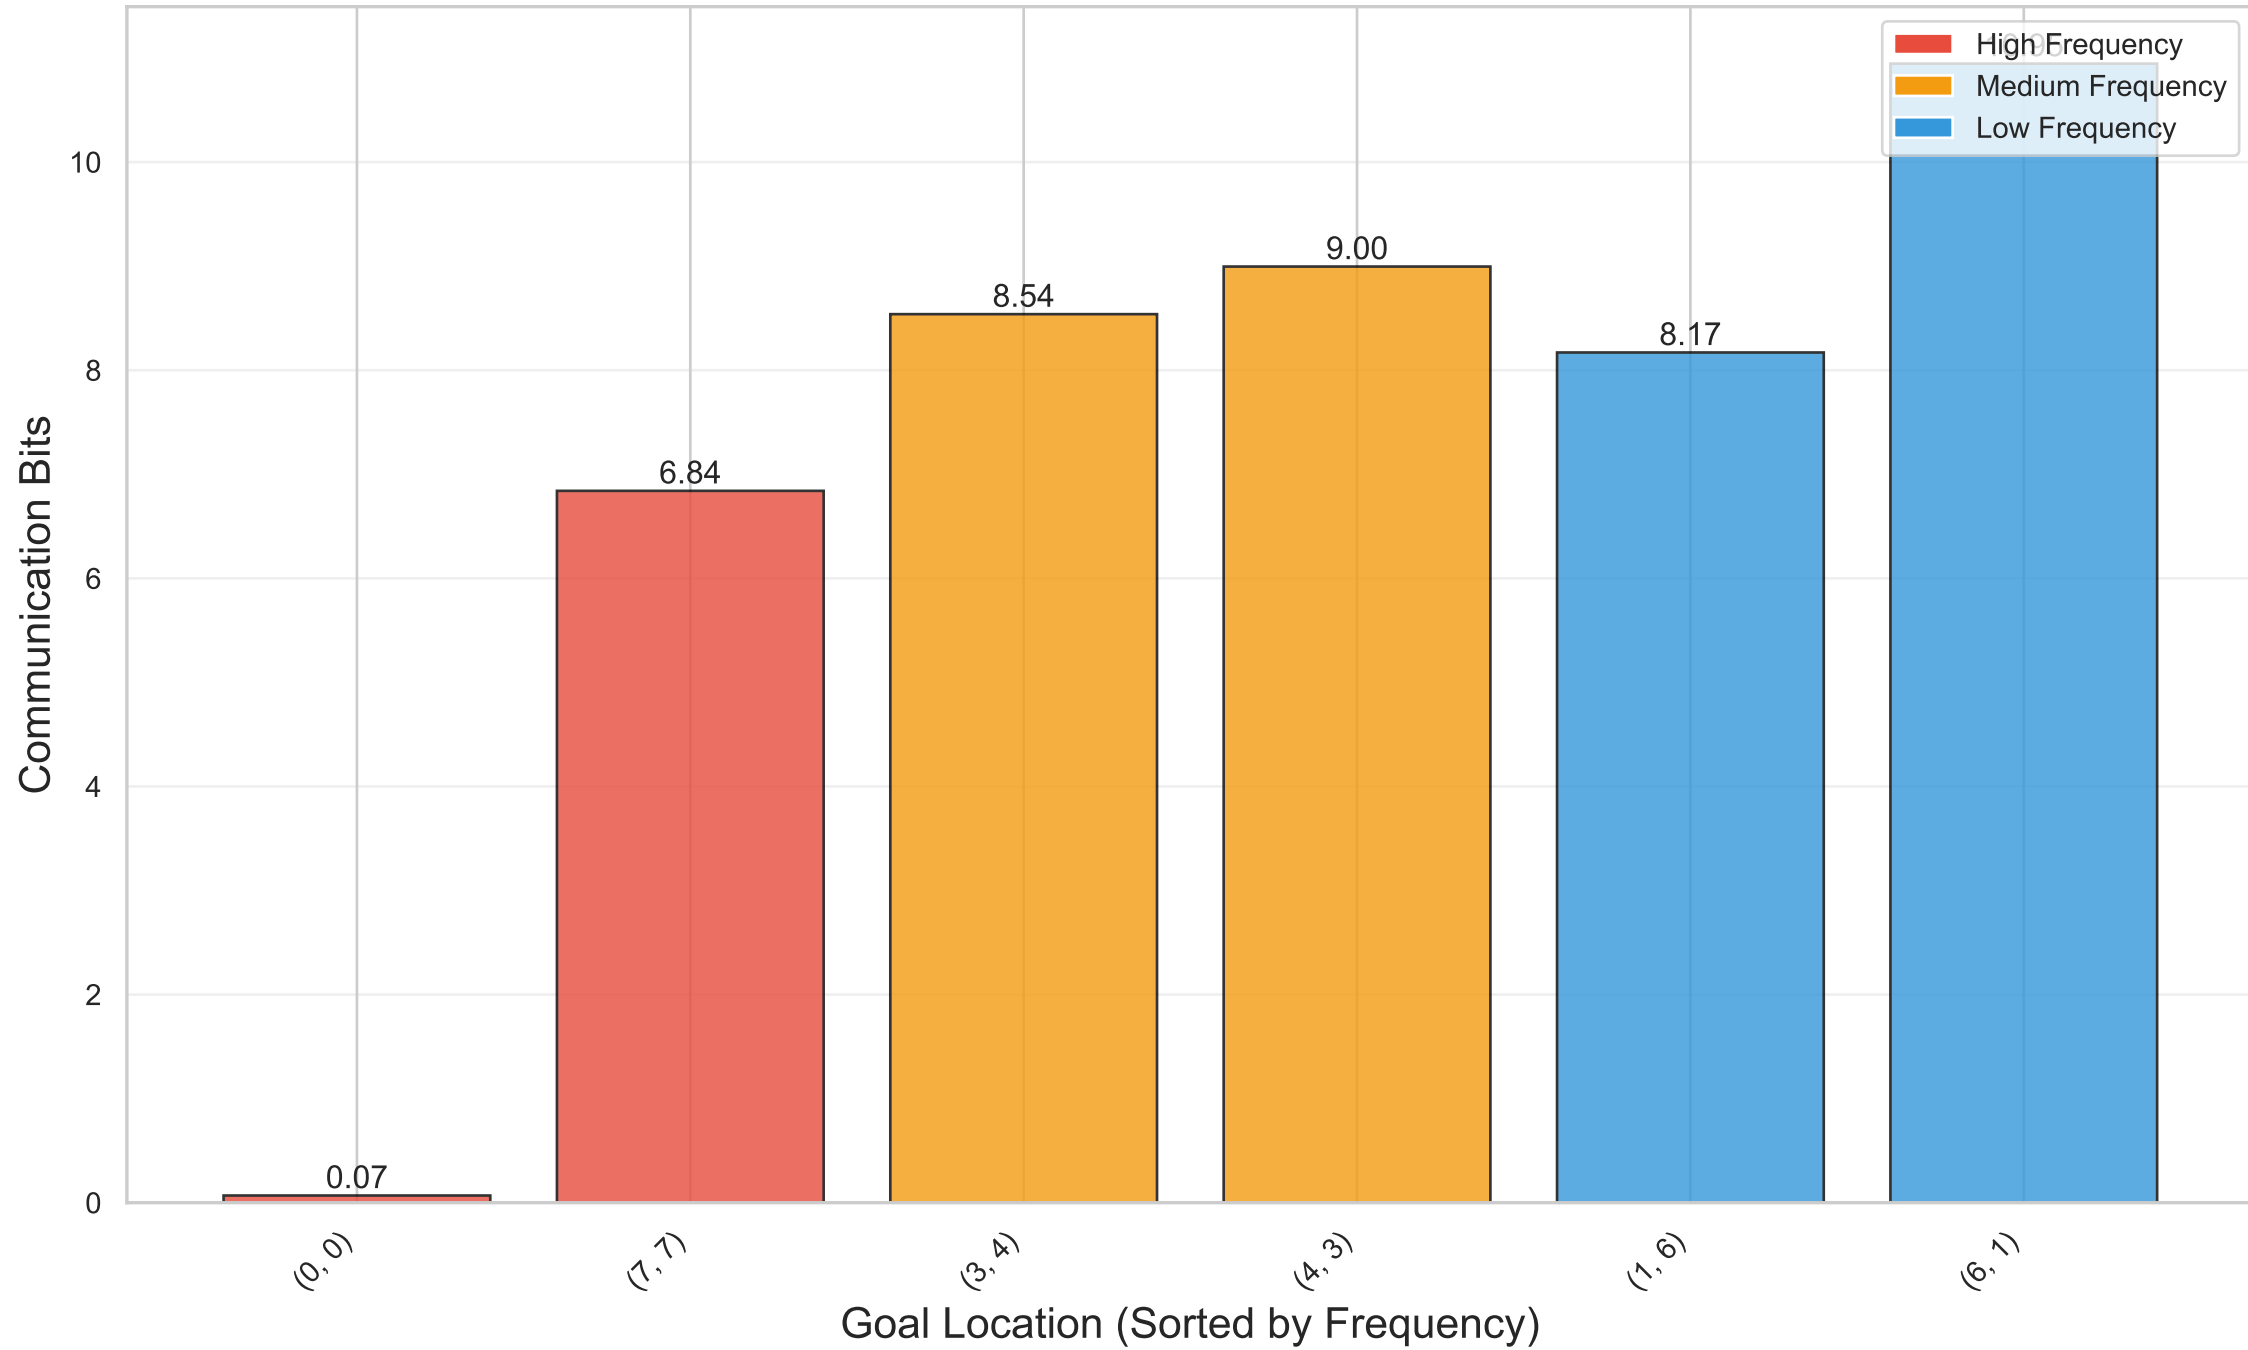

Supplement: supplementary_material [file bits_vs_frequency_barchart.pdf › Multi-Agent-Limited-Comms/ToyProblem/Good plots v2/bits_vs_frequency_barchart.pdf]

# Distribution of Communication Bits Across All Goals

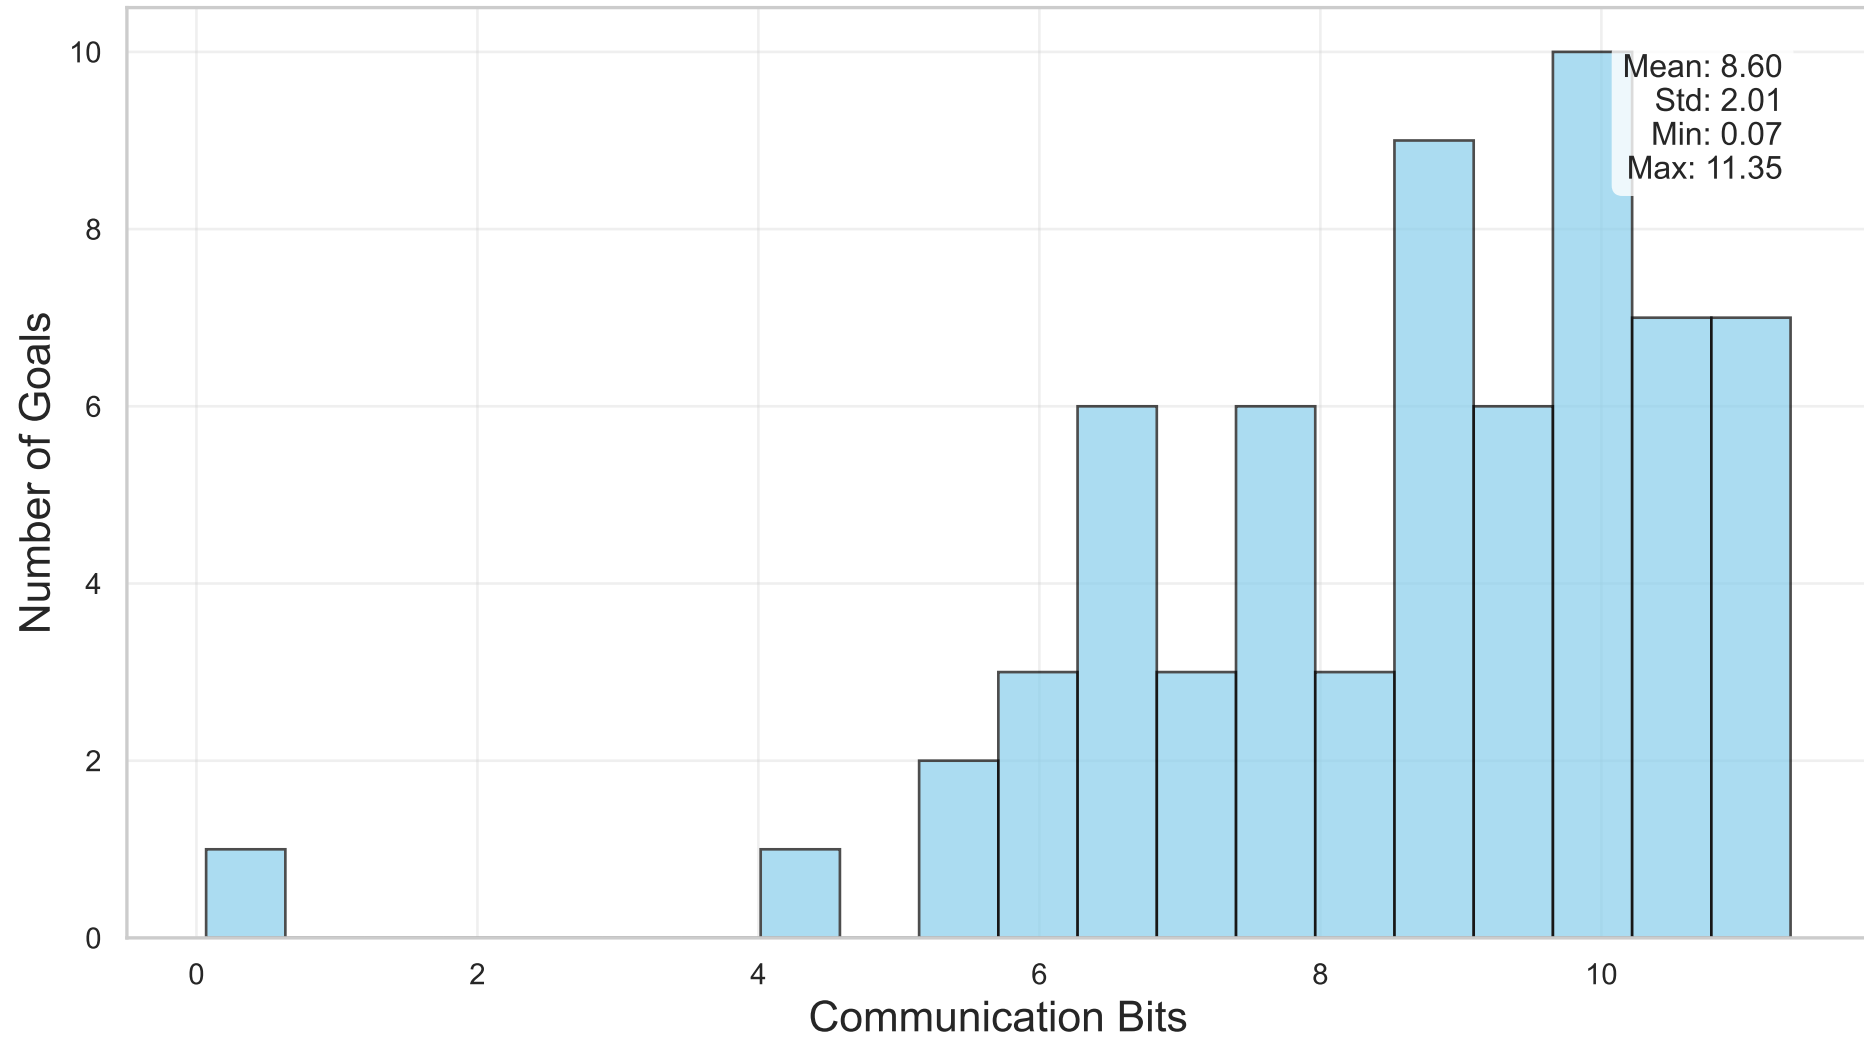

Supplement: supplementary_material [file communication_bits_distribution.pdf › Multi-Agent-Limited-Comms/ToyProblem/Good plots v2/communication_bits_distribution.pdf]

# Communication Bits: Goal Positions vs Non-Goal Positions

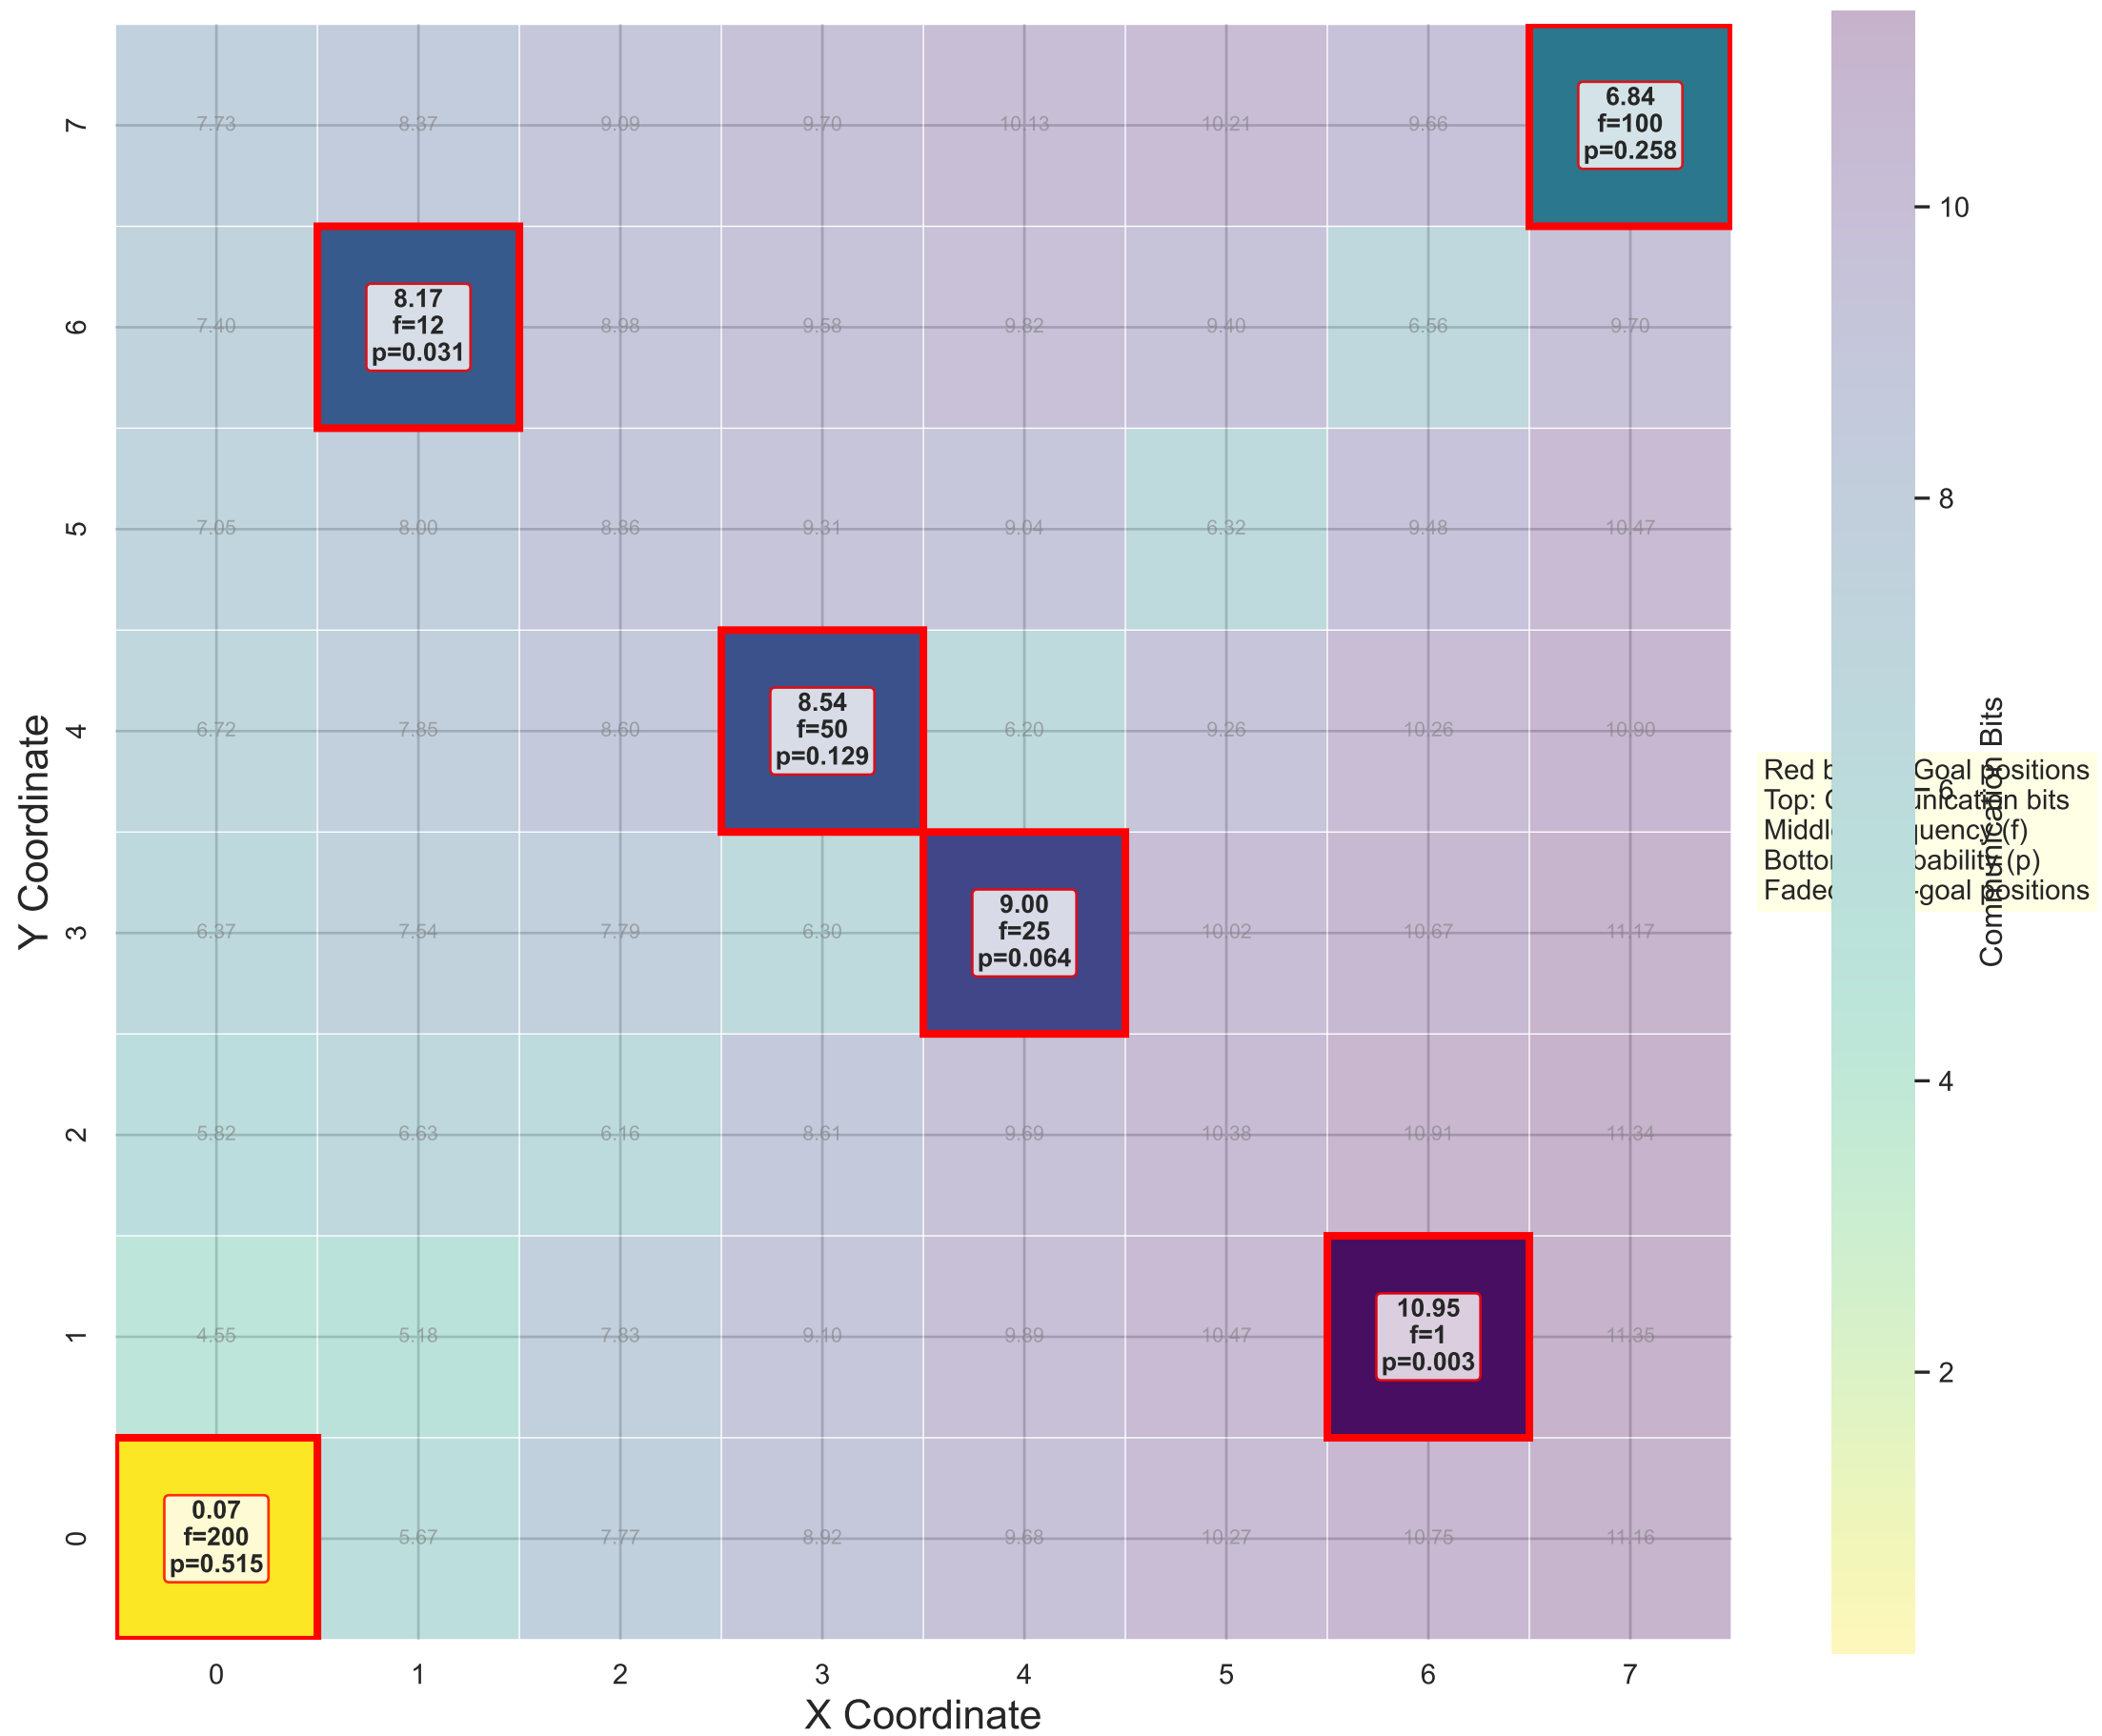

Supplement: supplementary_material [file communication_bits_heatmap.pdf › Multi-Agent-Limited-Comms/ToyProblem/Good plots v2/communication_bits_heatmap.pdf]

Communication Bits vs Goal Frequency  
(Correlation:  $r = -0.961$ )

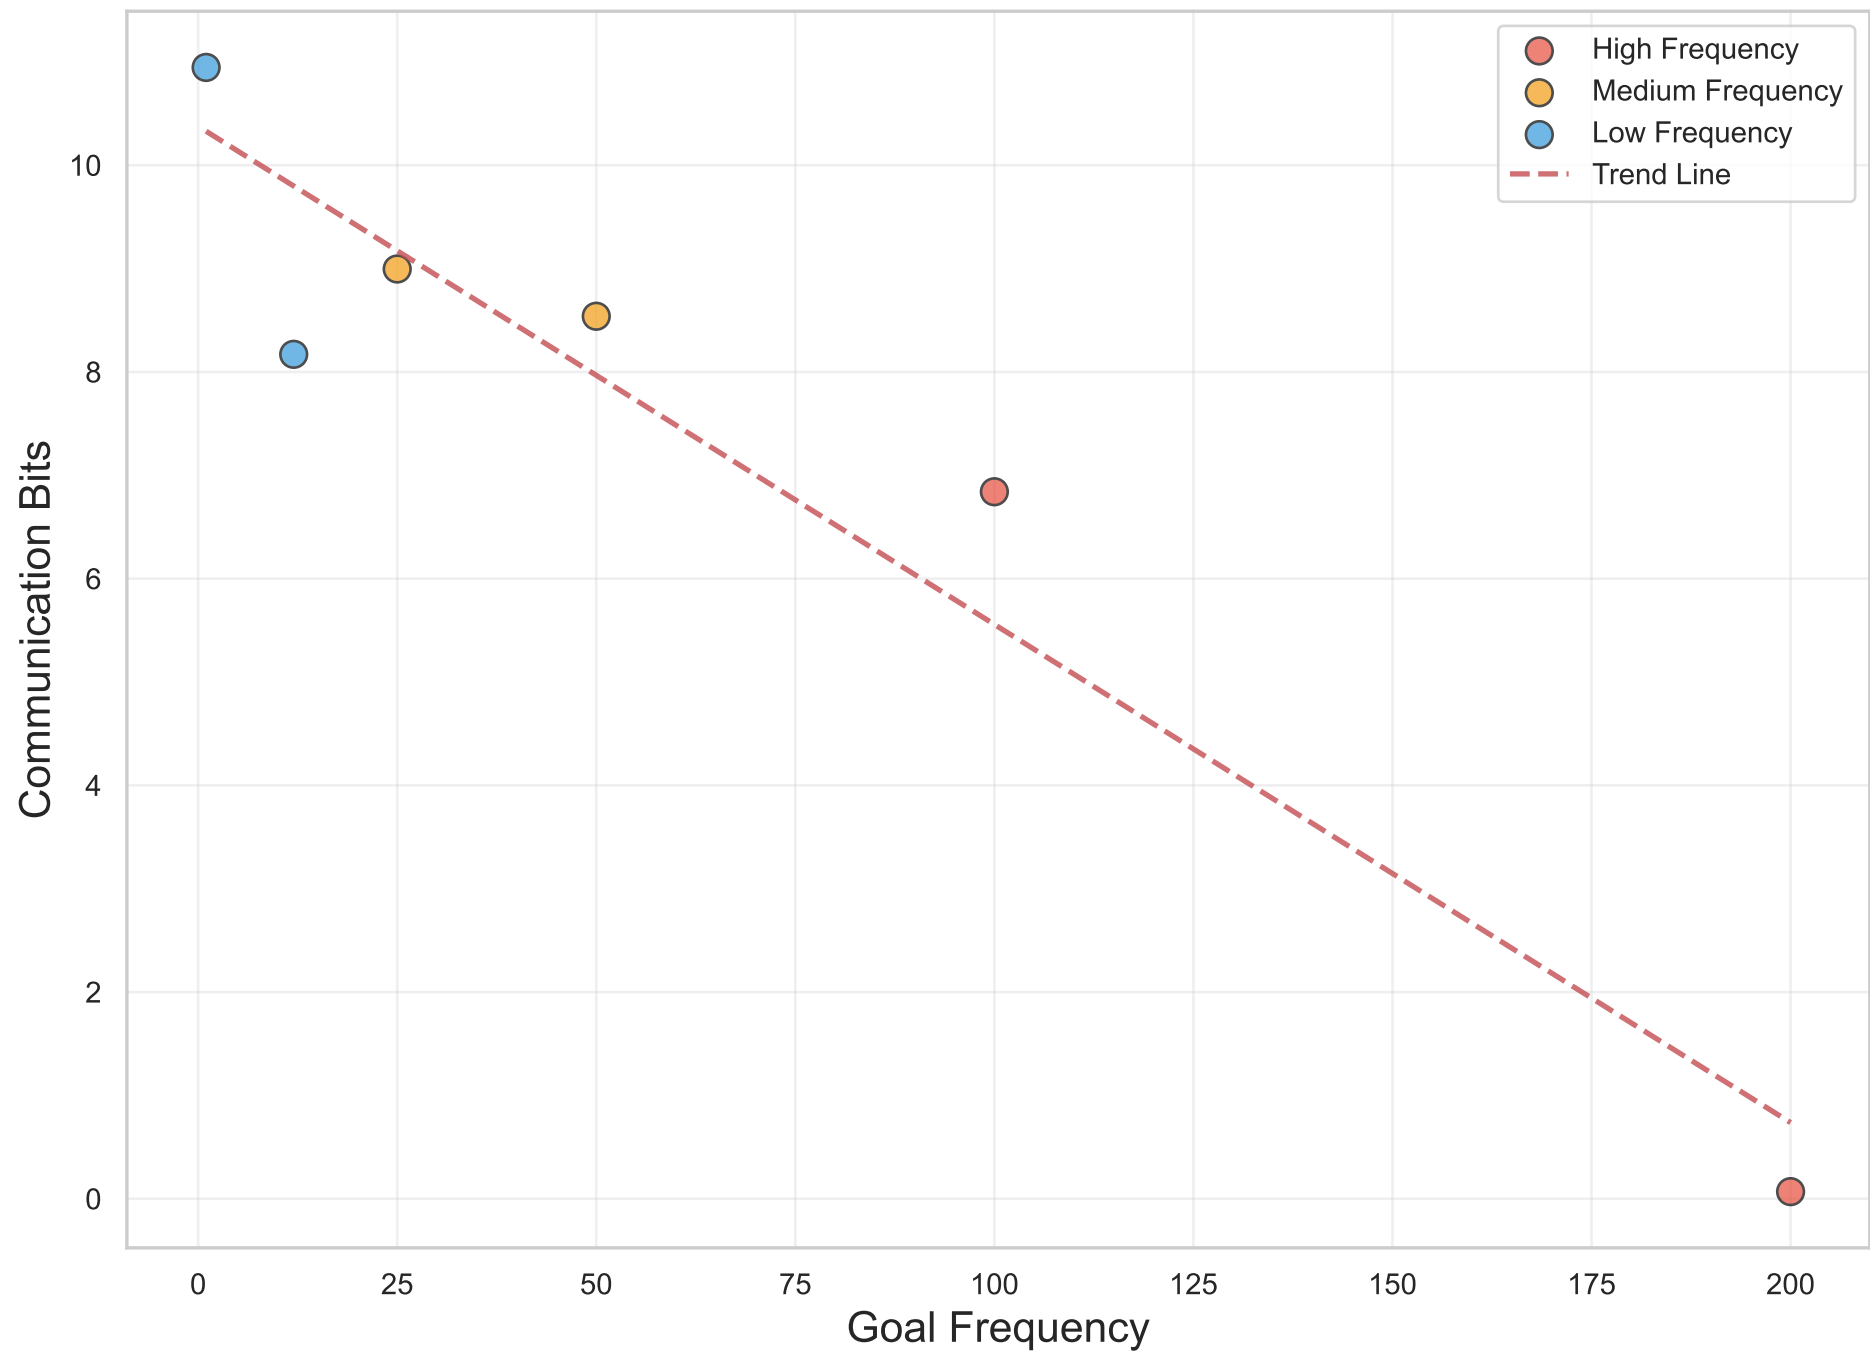

Supplement: supplementary_material [file frequency_cost_correlation.pdf › Multi-Agent-Limited-Comms/ToyProblem/Good plots v2/frequency_cost_correlation.pdf]

# Goal Position Analysis

## Communication Bits (All Positions)

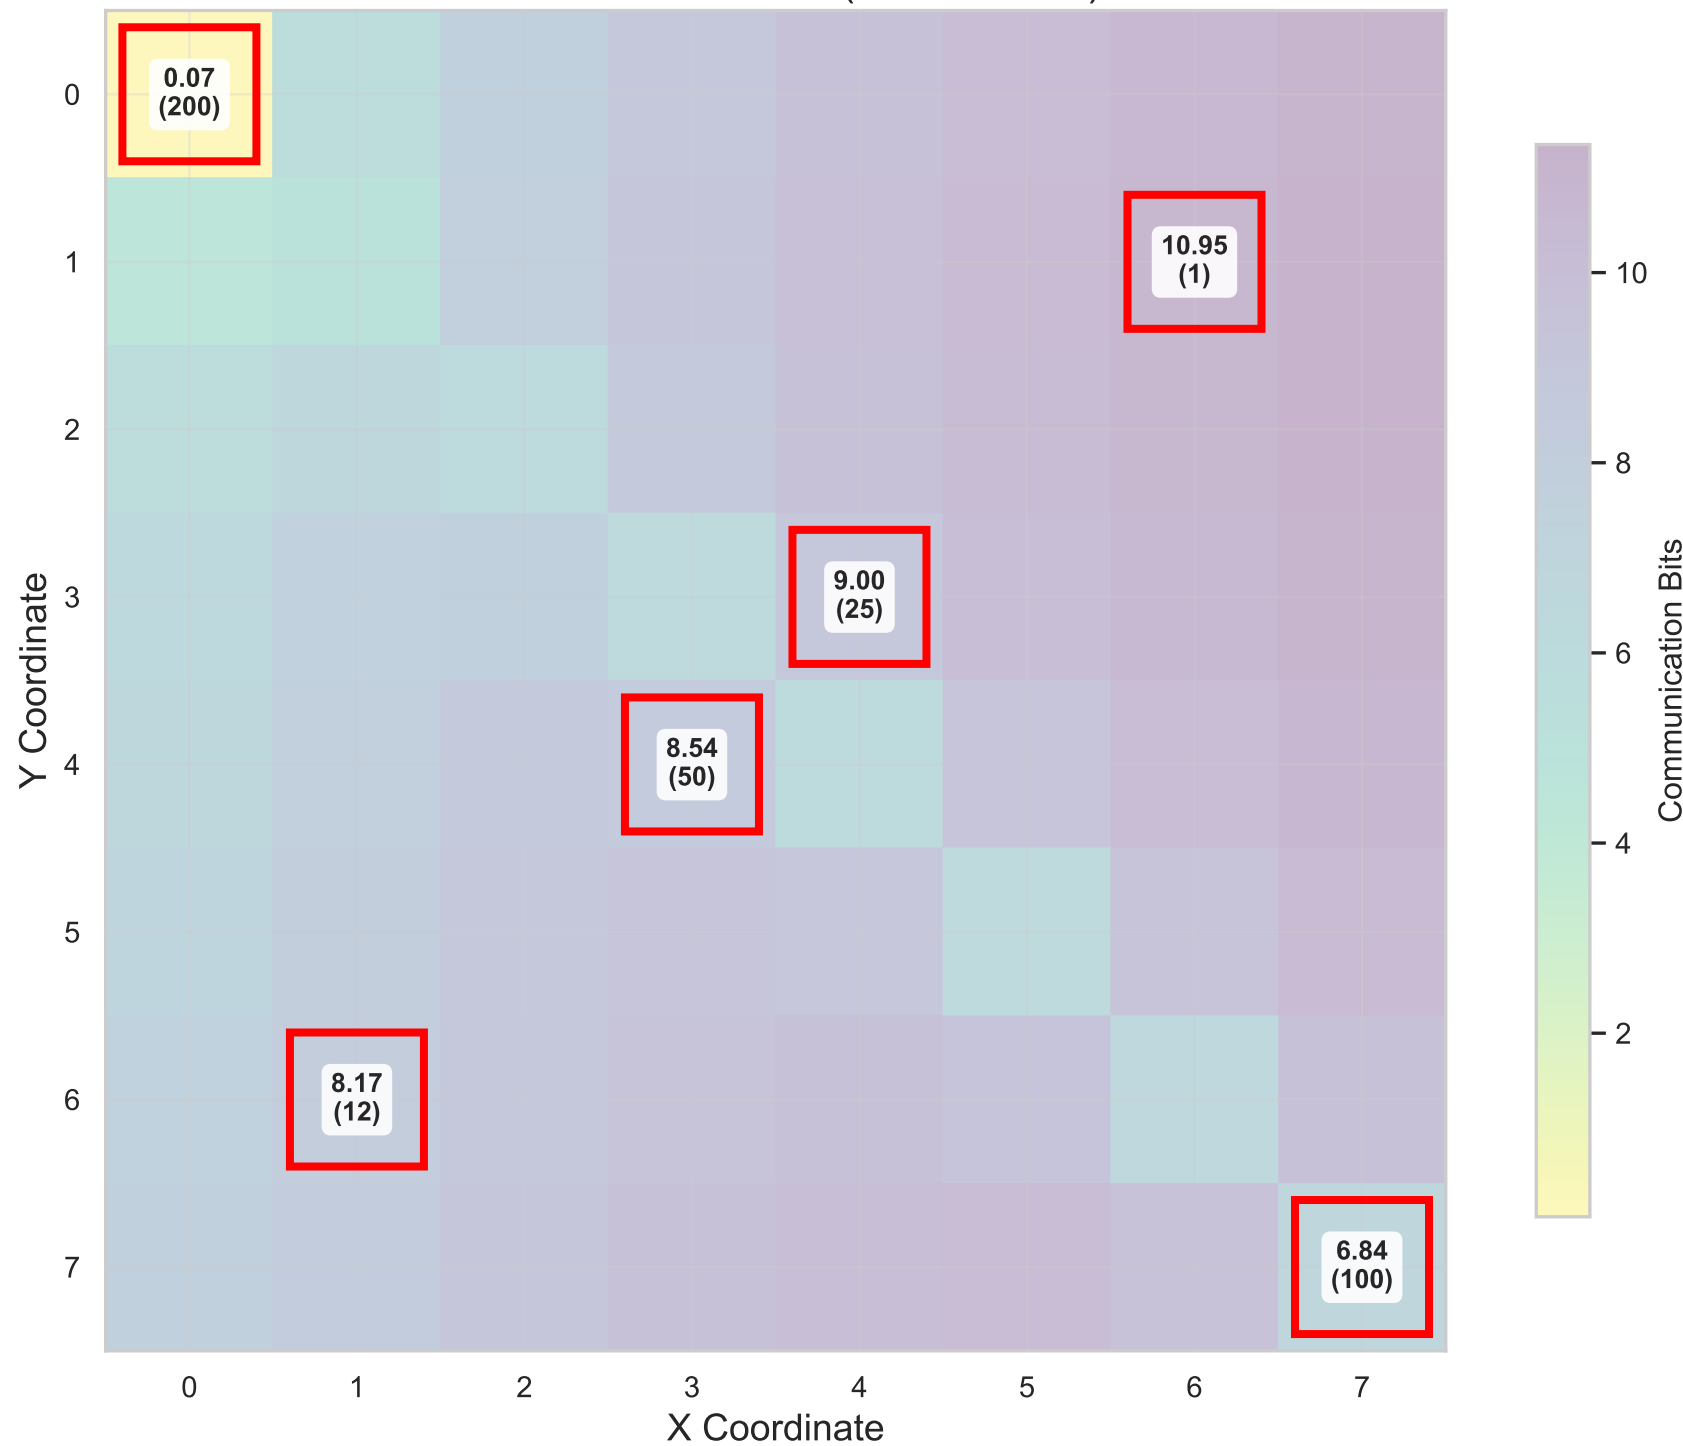

## Goal Sampling Probabilities

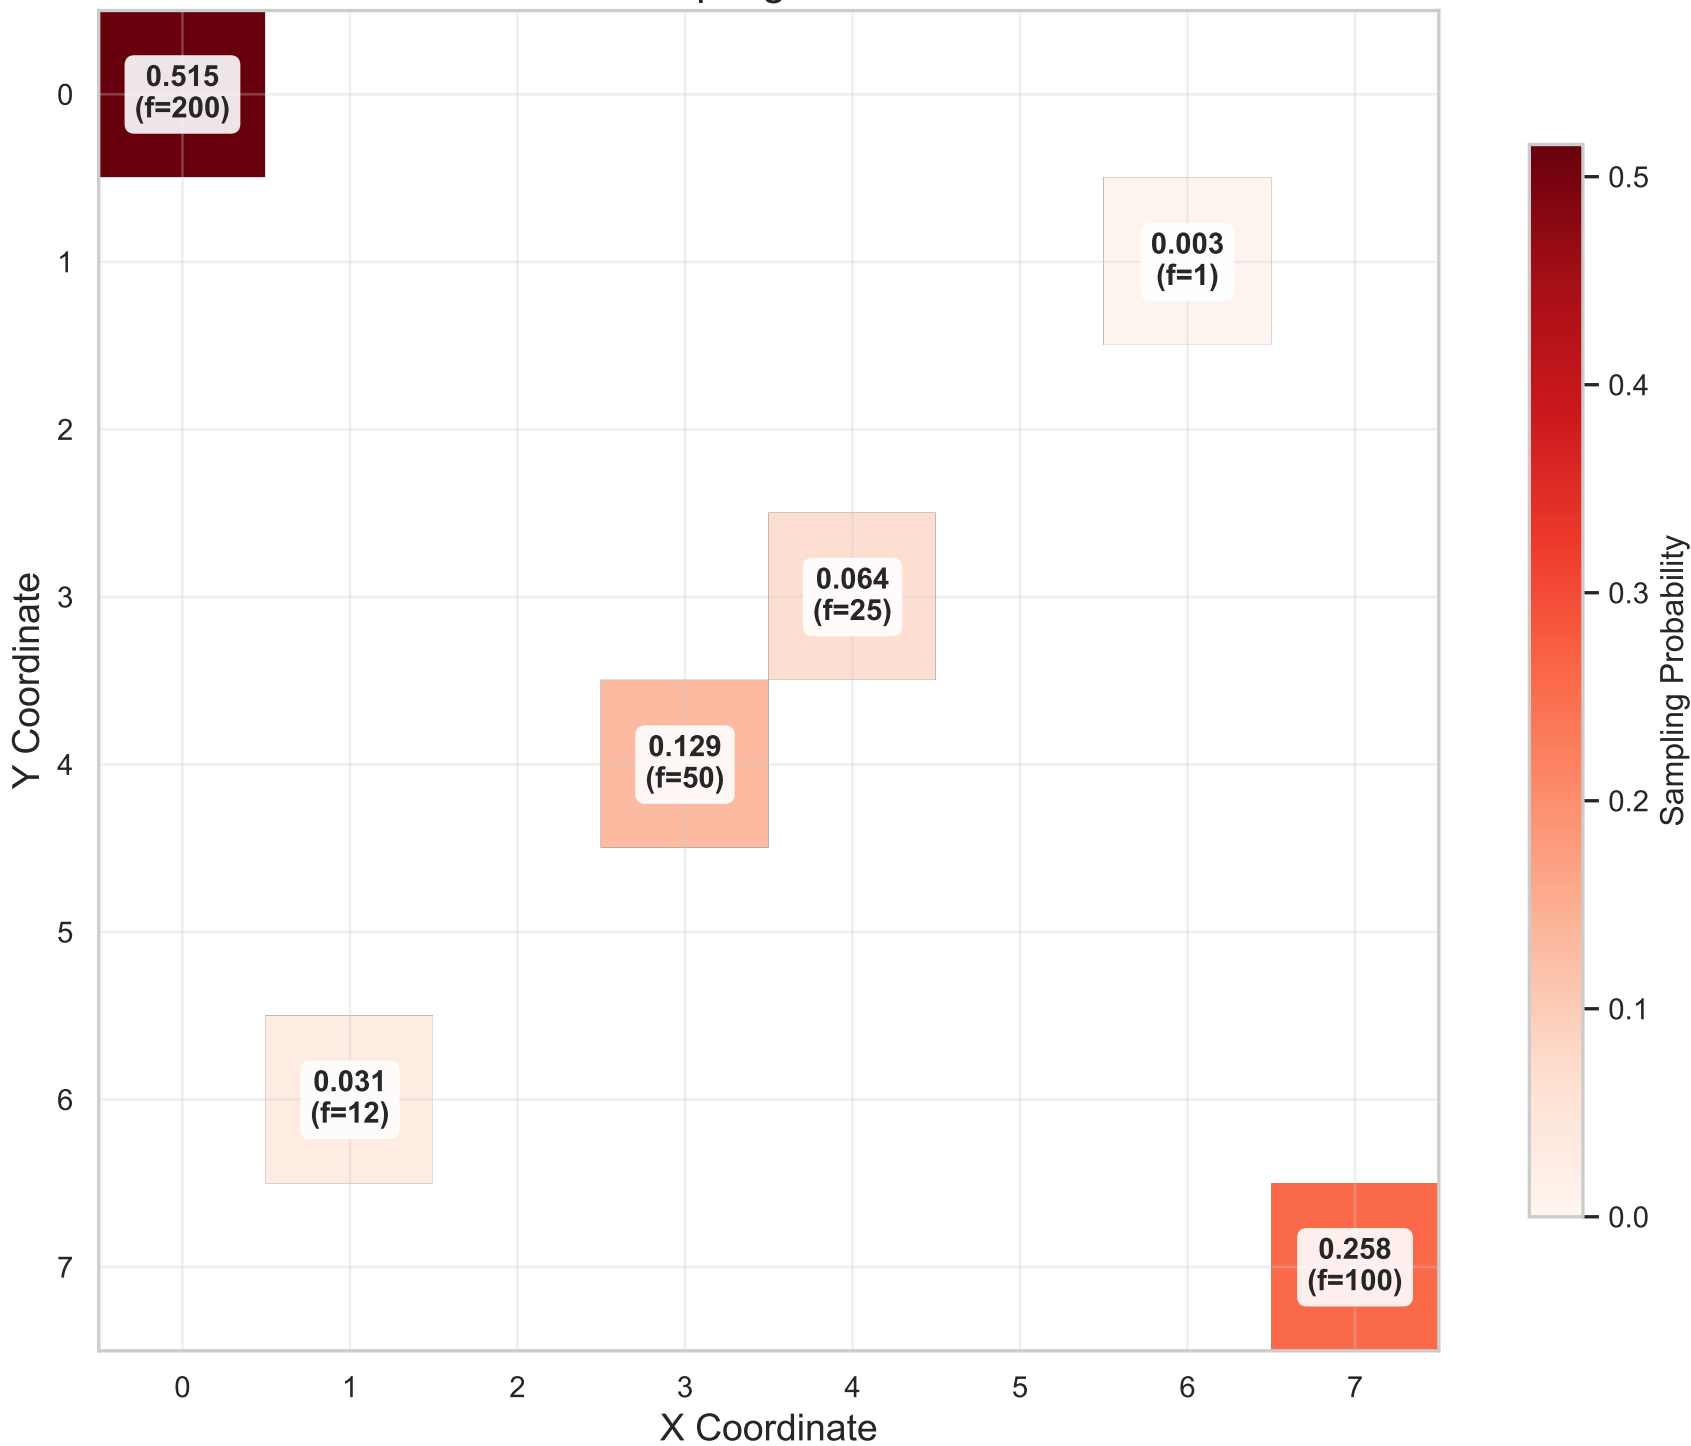

Supplement: supplementary_material [file goal_analysis_comparison.pdf › Multi-Agent-Limited-Comms/ToyProblem/Good plots v2/goal_analysis_comparison.pdf]

Communication Bits per Goal Location  
(Sorted by Goal Frequency)

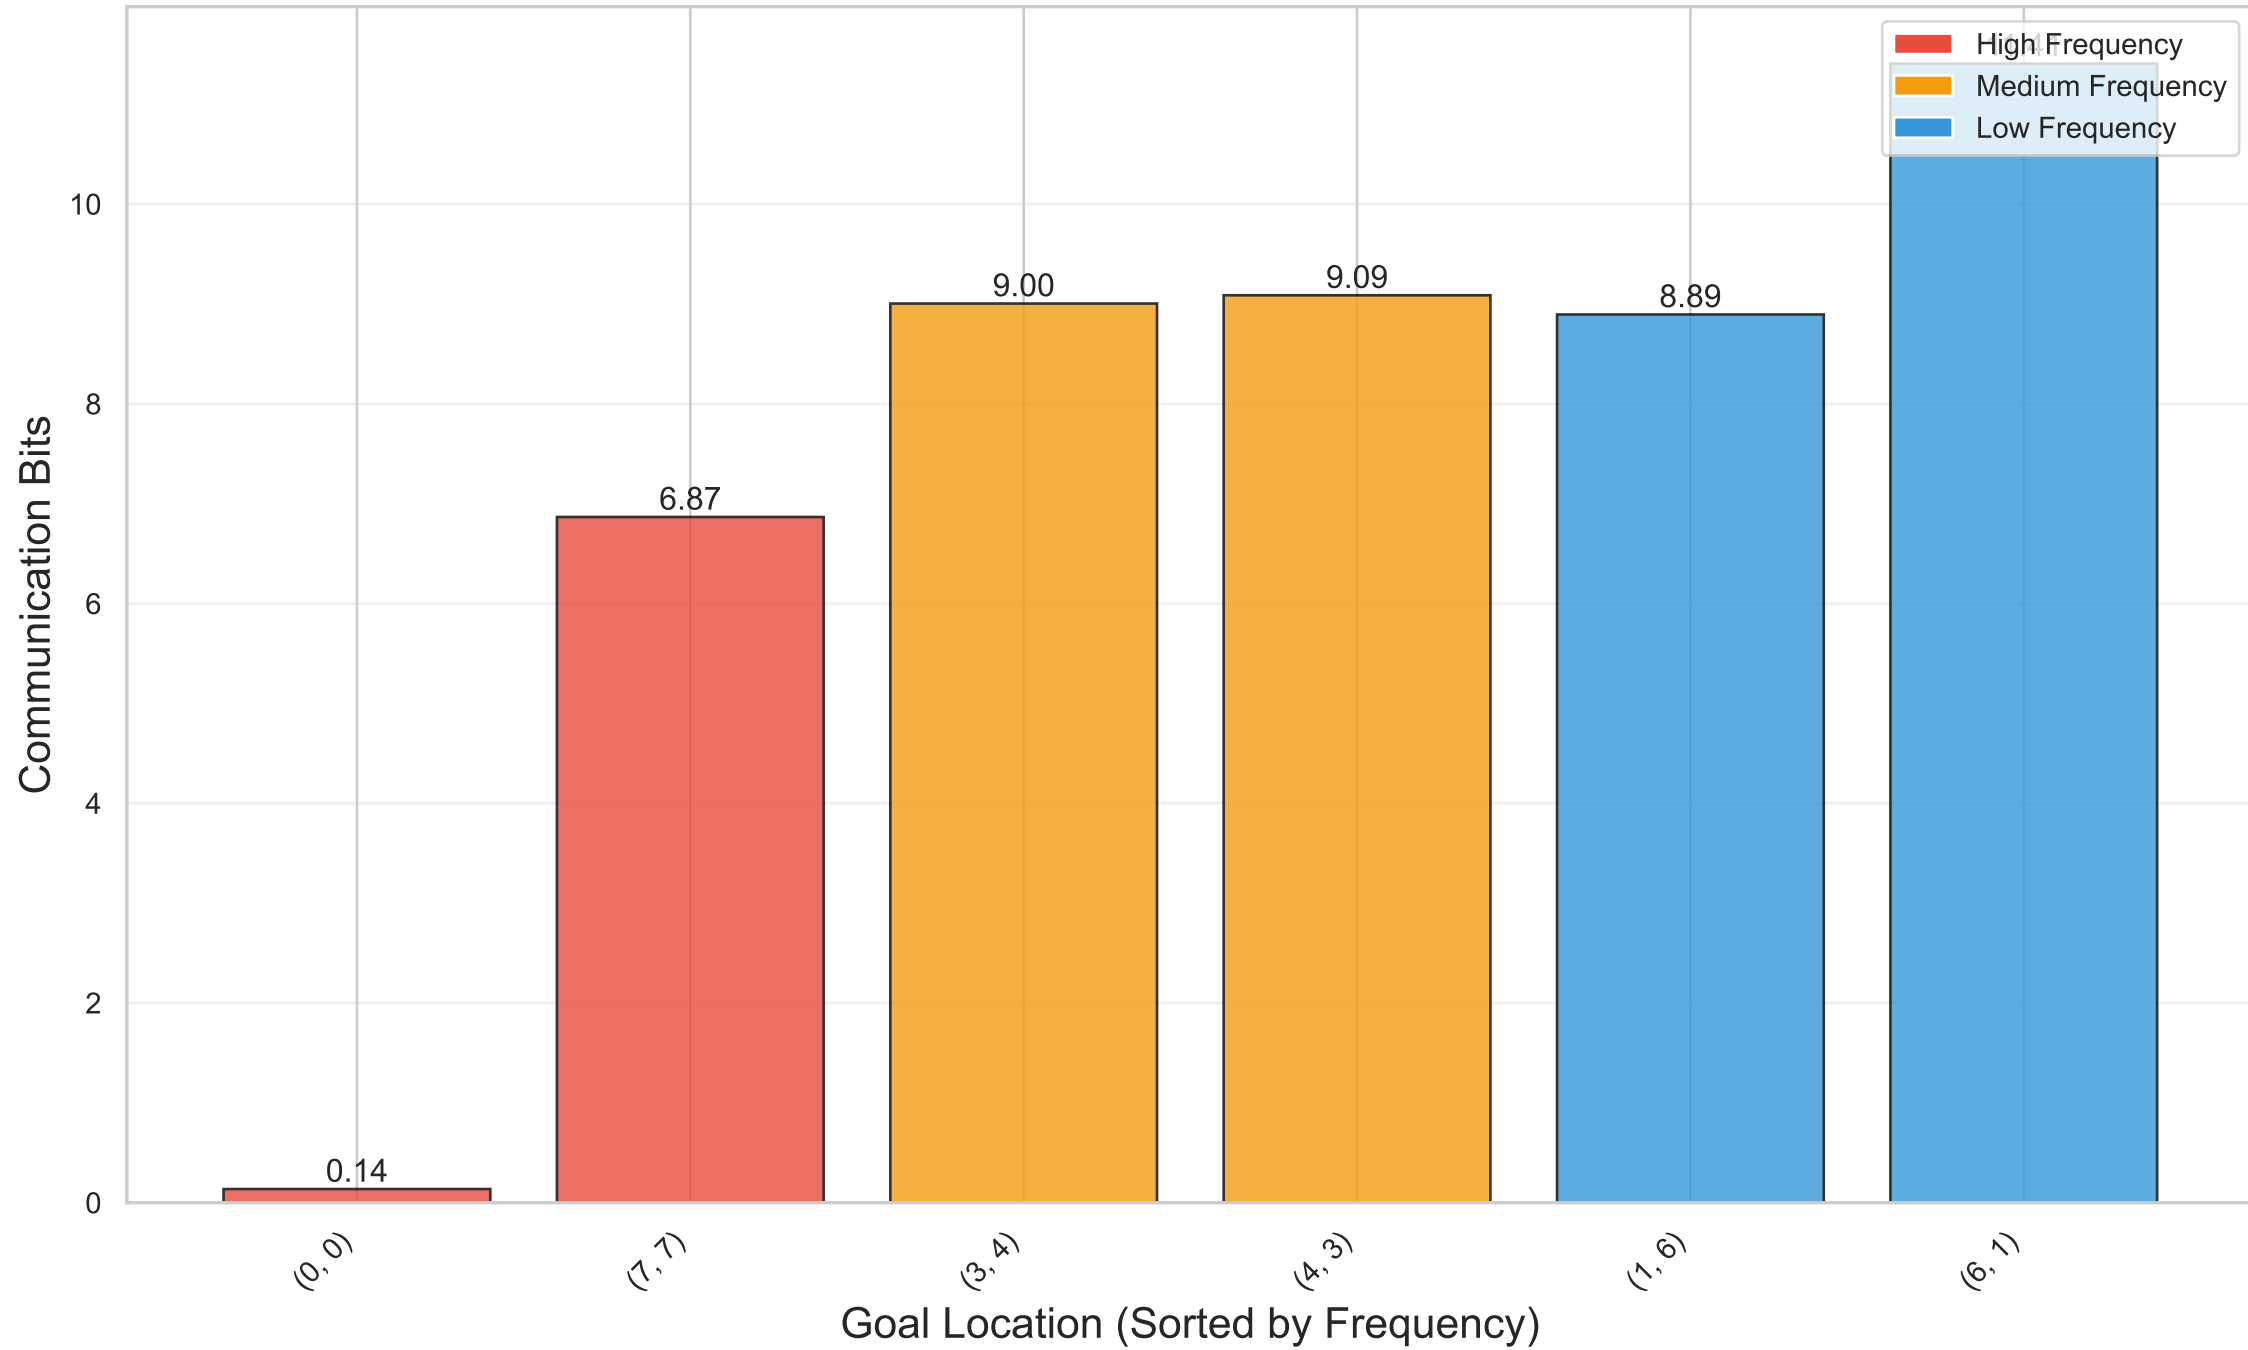

Supplement: supplementary_material [file bits_vs_frequency_barchart.pdf › Multi-Agent-Limited-Comms/ToyProblem/Good plots/bits_vs_frequency_barchart.pdf]

Distribution of Communication Bits Across All Goals

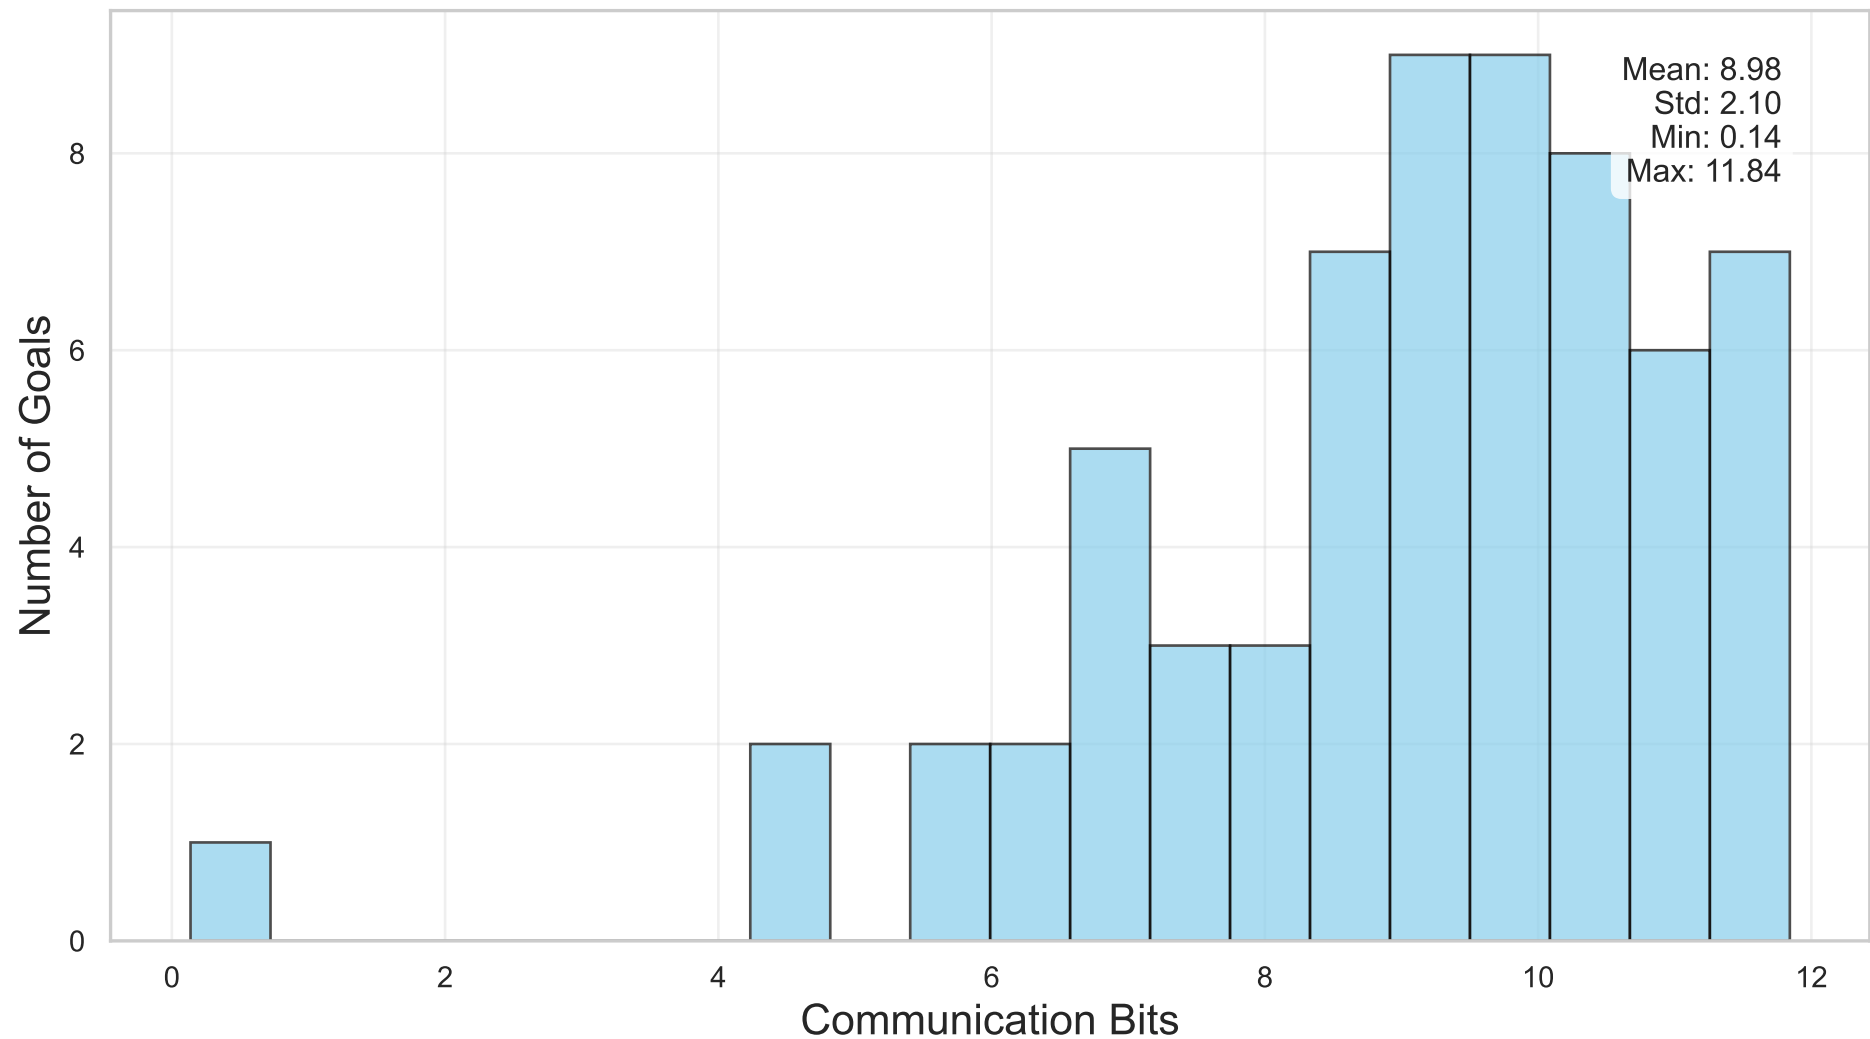

Supplement: supplementary_material [file communication_bits_distribution.pdf › Multi-Agent-Limited-Comms/ToyProblem/Good plots/communication_bits_distribution.pdf]

# Communication Bits: Goal Positions vs Non-Goal Positions

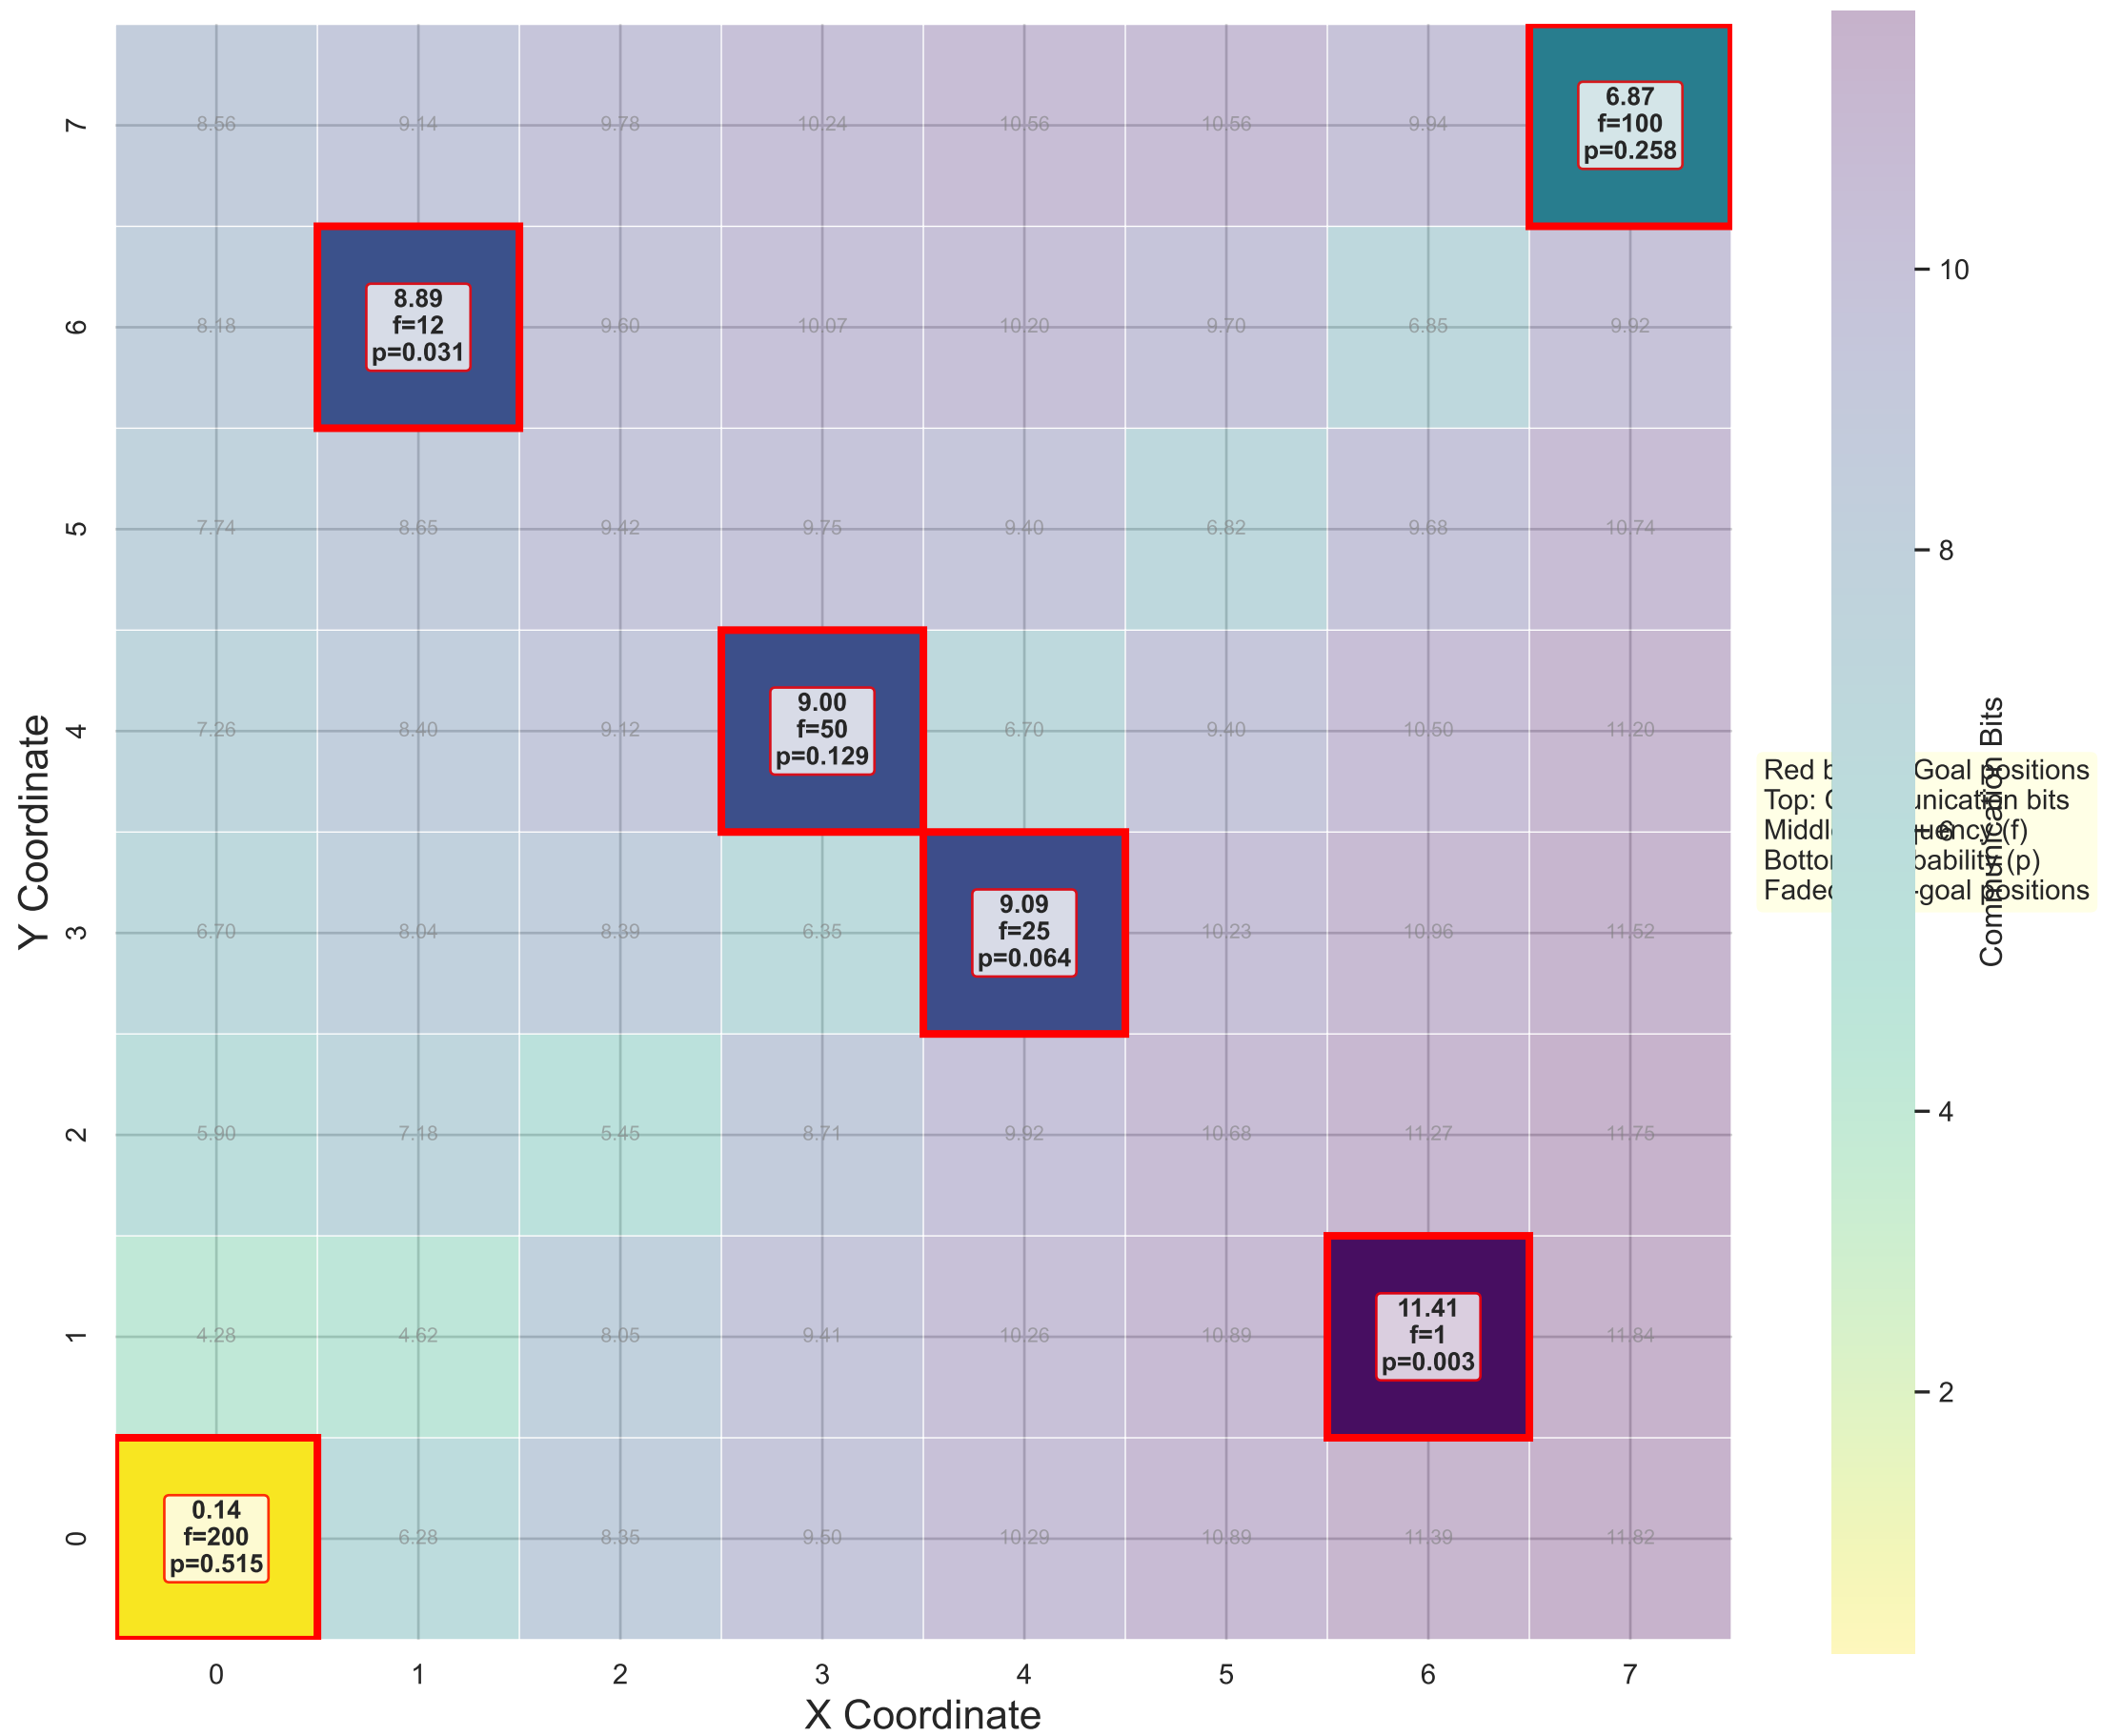

Supplement: supplementary_material [file communication_bits_heatmap.pdf › Multi-Agent-Limited-Comms/ToyProblem/Good plots/communication_bits_heatmap.pdf]

Communication Bits vs Goal Frequency  
(Correlation:  $r = -0.971$ )

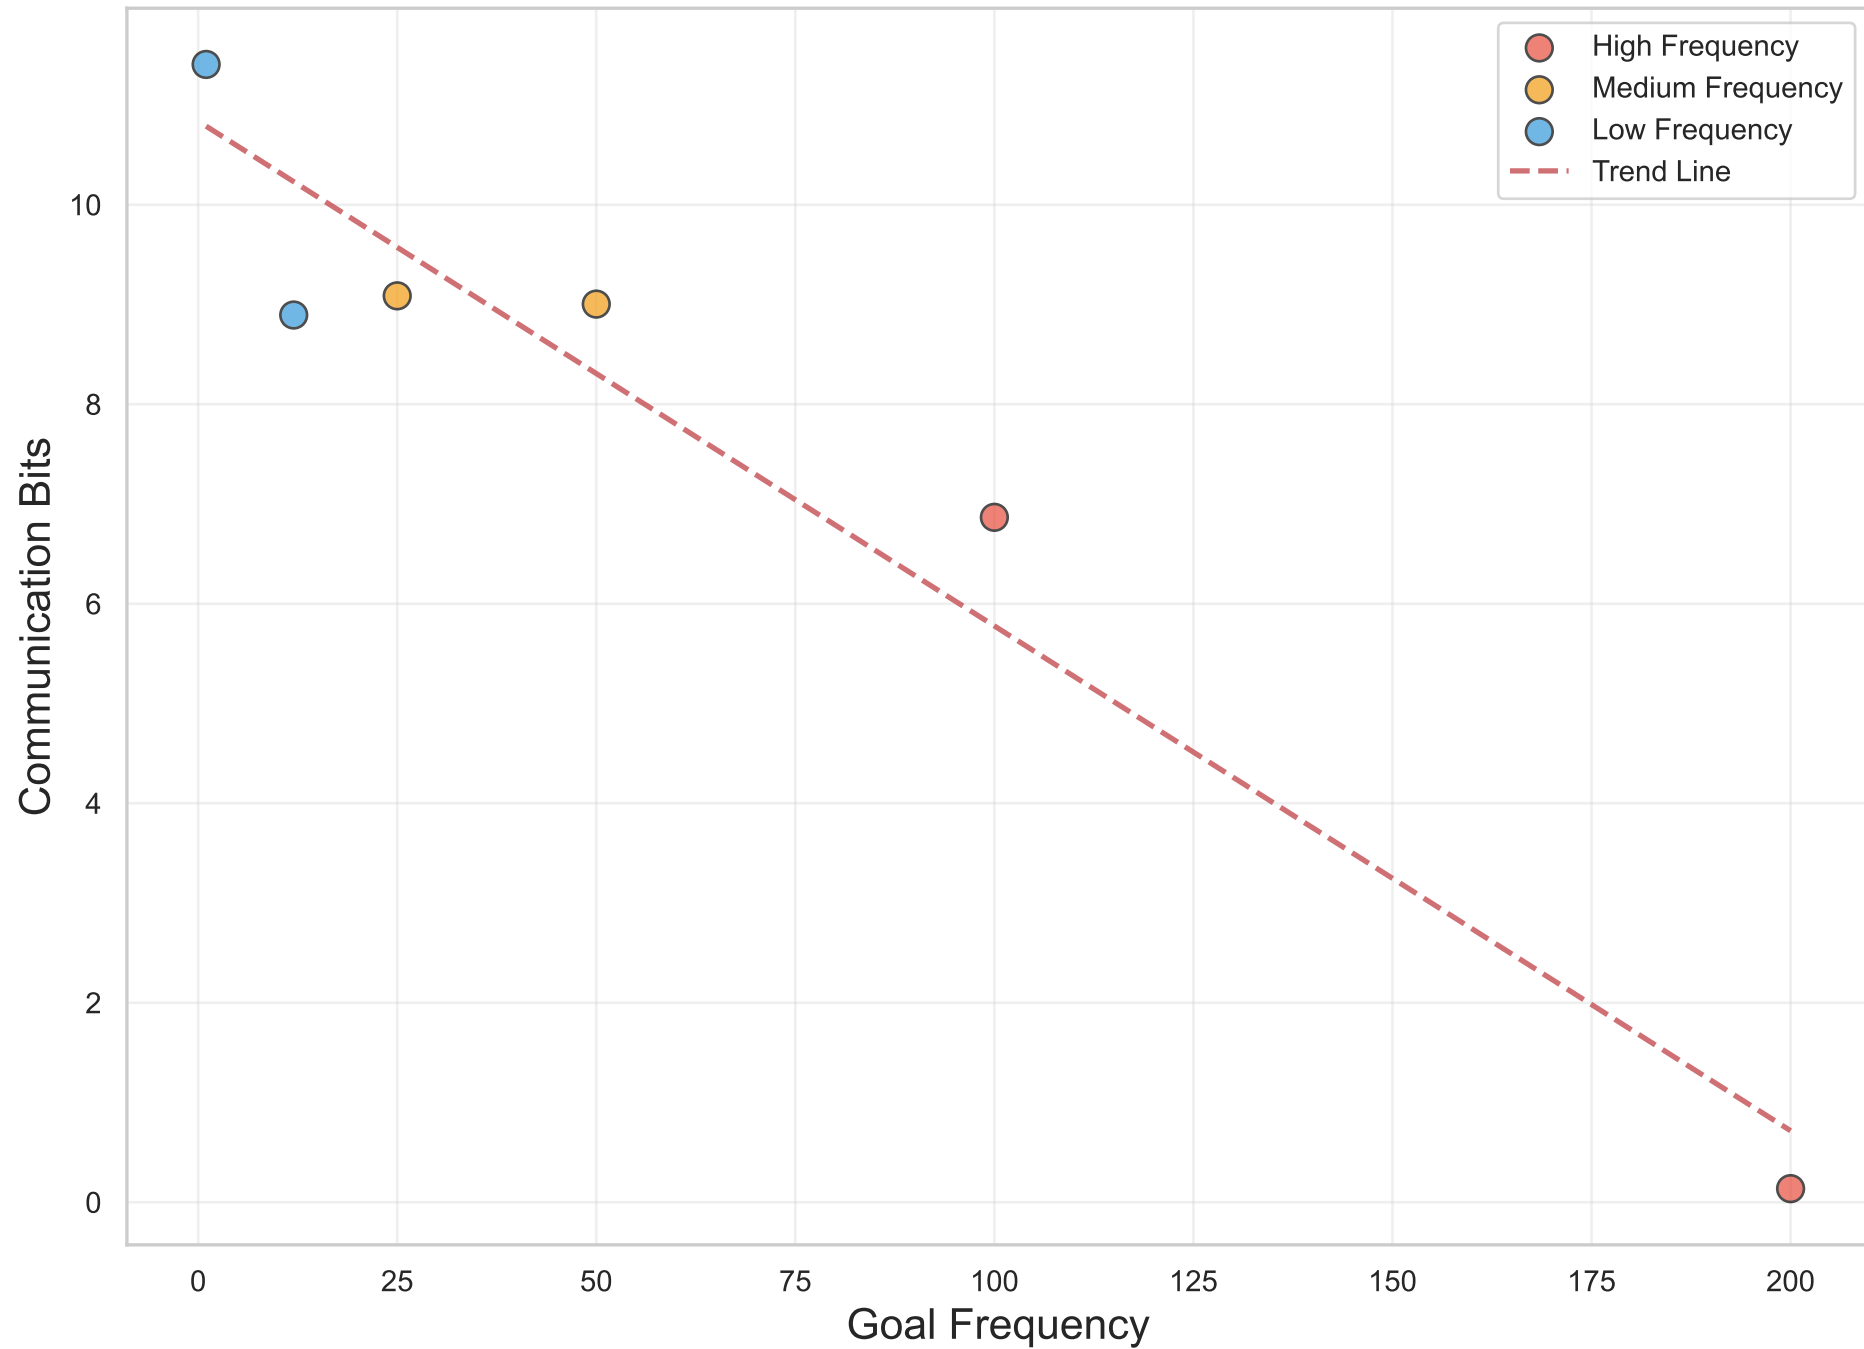

Supplement: supplementary_material [file frequency_cost_correlation.pdf › Multi-Agent-Limited-Comms/ToyProblem/Good plots/frequency_cost_correlation.pdf]

# Goal Position Analysis

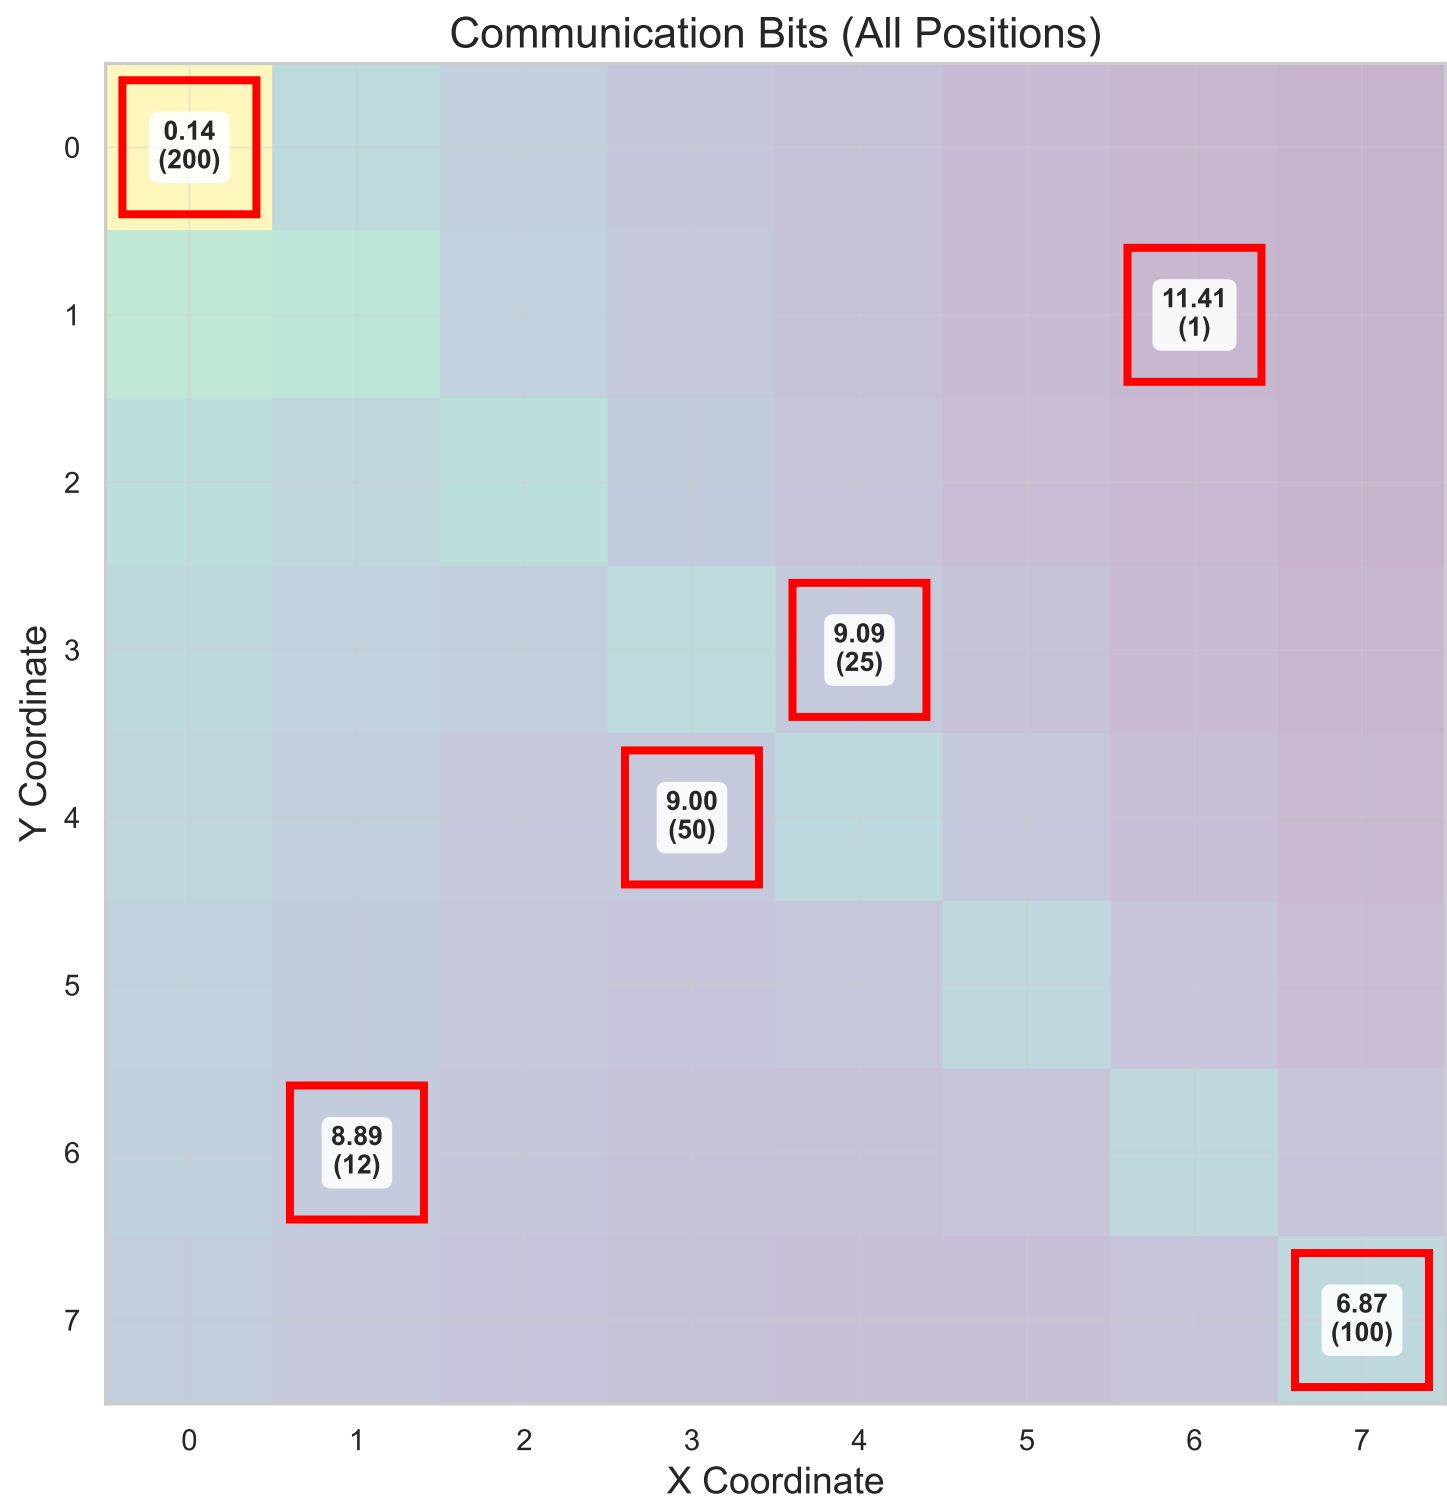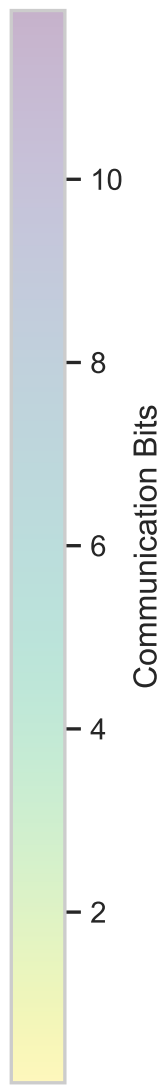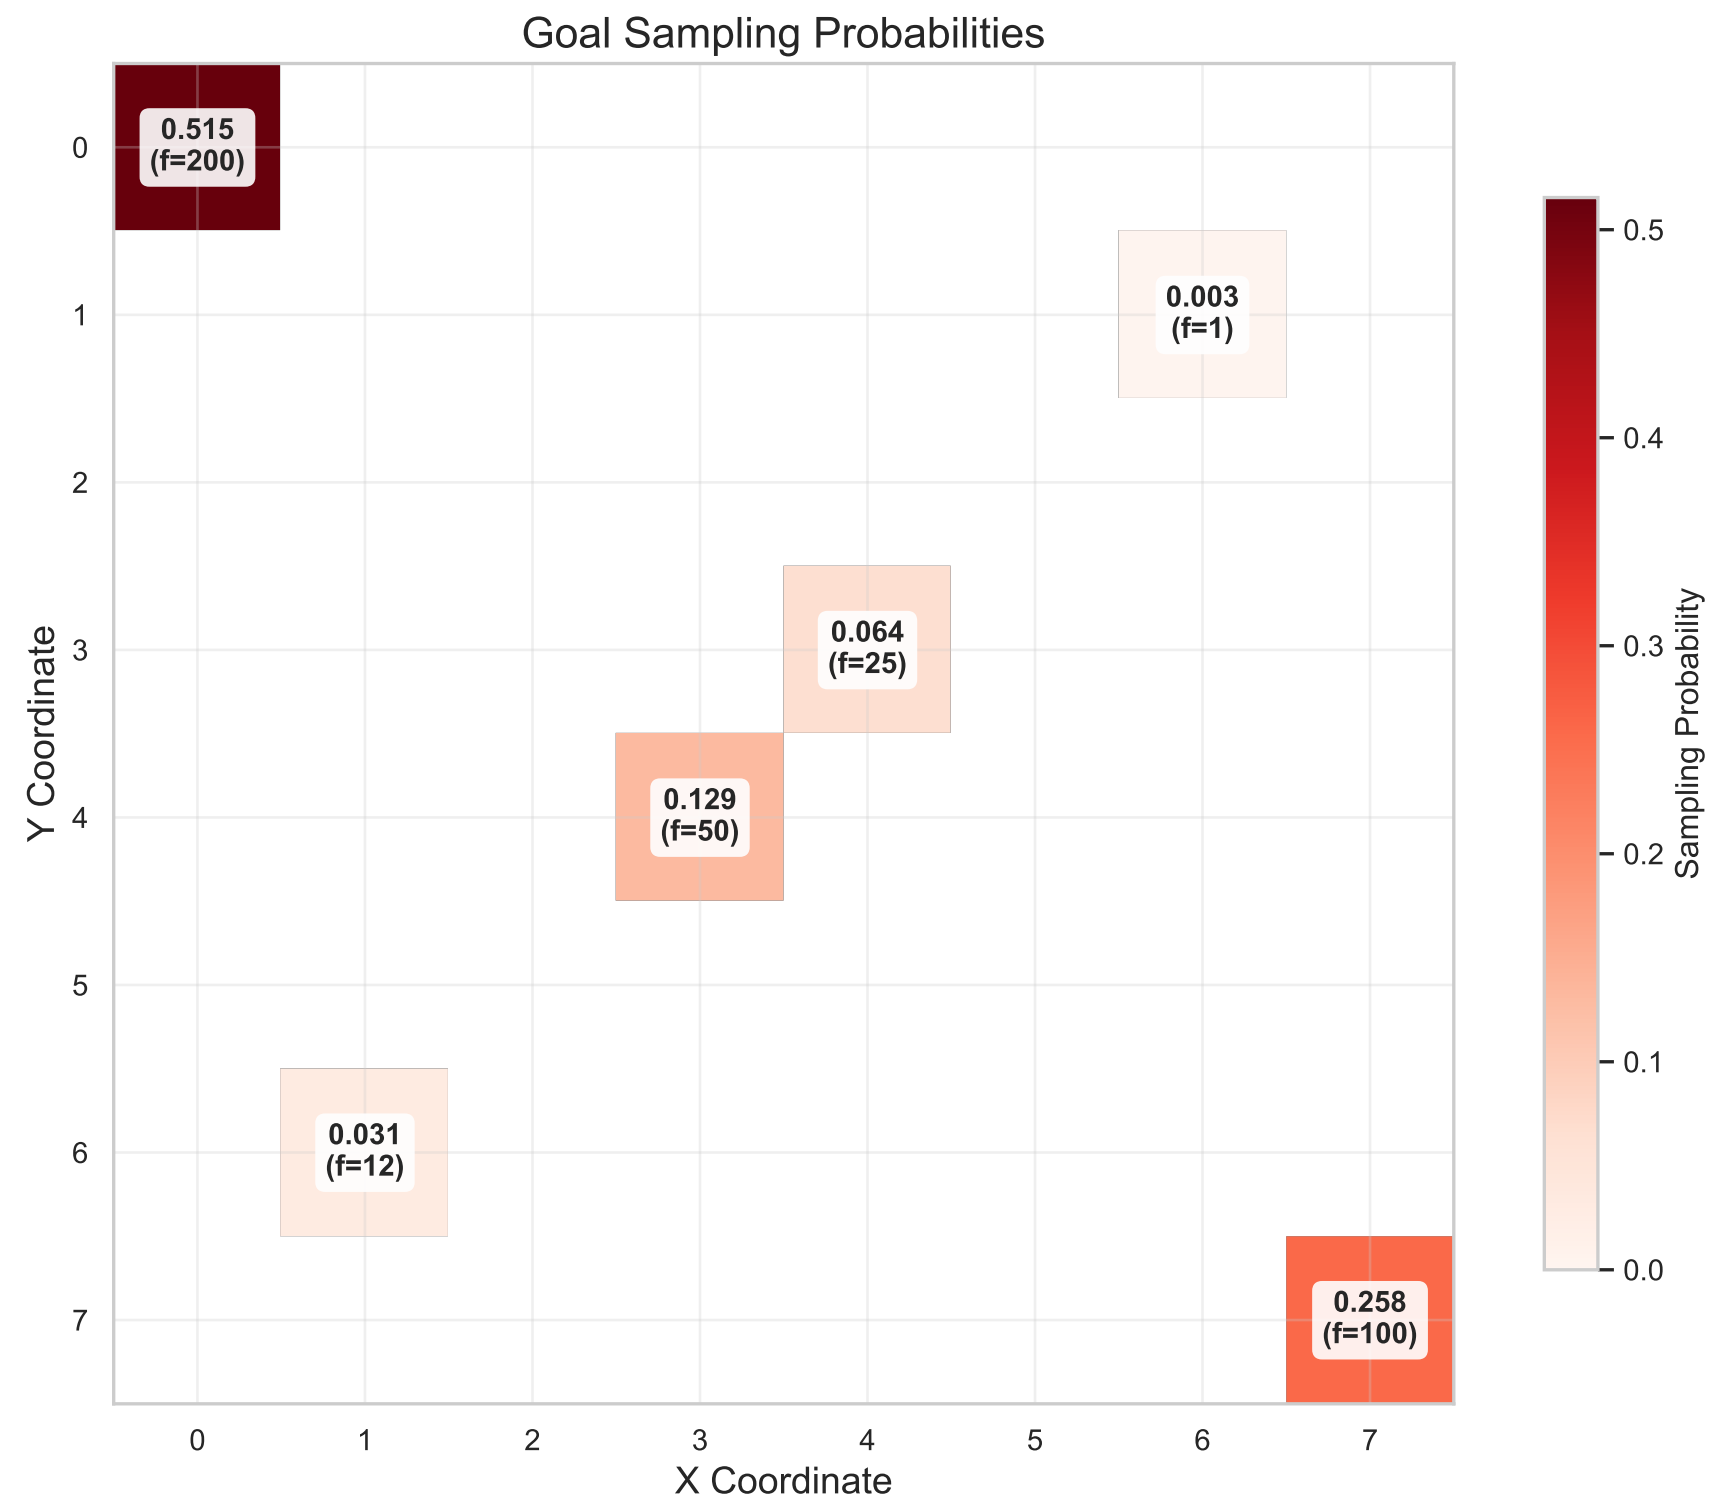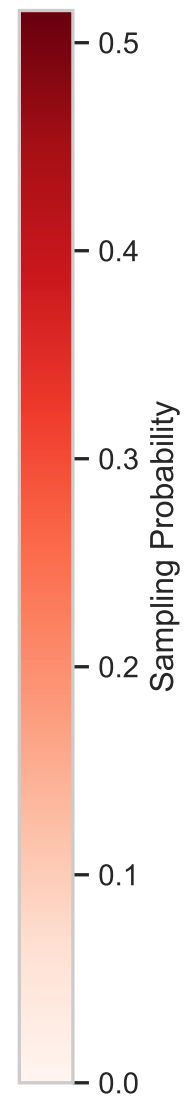

Supplement: supplementary_material [file goal_analysis_comparison.pdf › Multi-Agent-Limited-Comms/ToyProblem/Good plots/goal_analysis_comparison.pdf]

# Distribution of Communication Bits Across All Goals

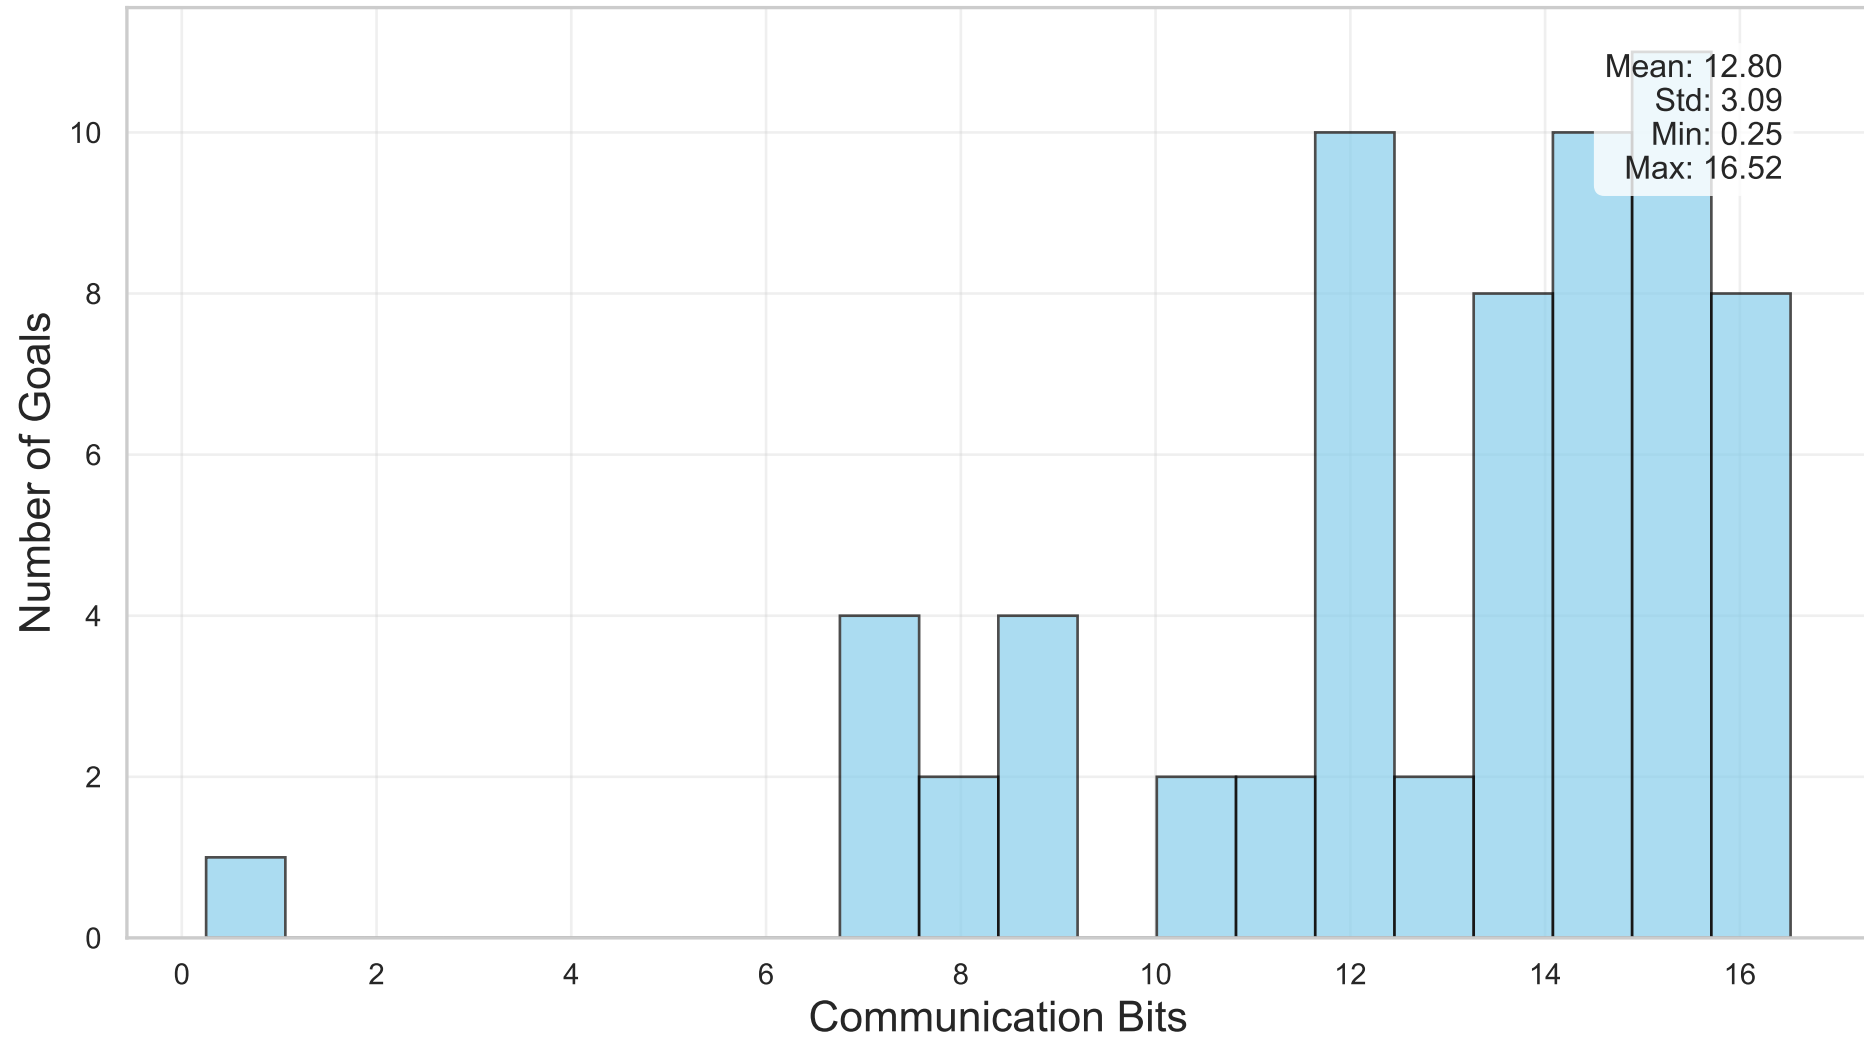

Supplement: supplementary_material [file communication_bits_distribution.pdf › Multi-Agent-Limited-Comms/ToyProblem/communication_bits_distribution.pdf]

# Communication Bits: Goal Positions vs Non-Goal Positions

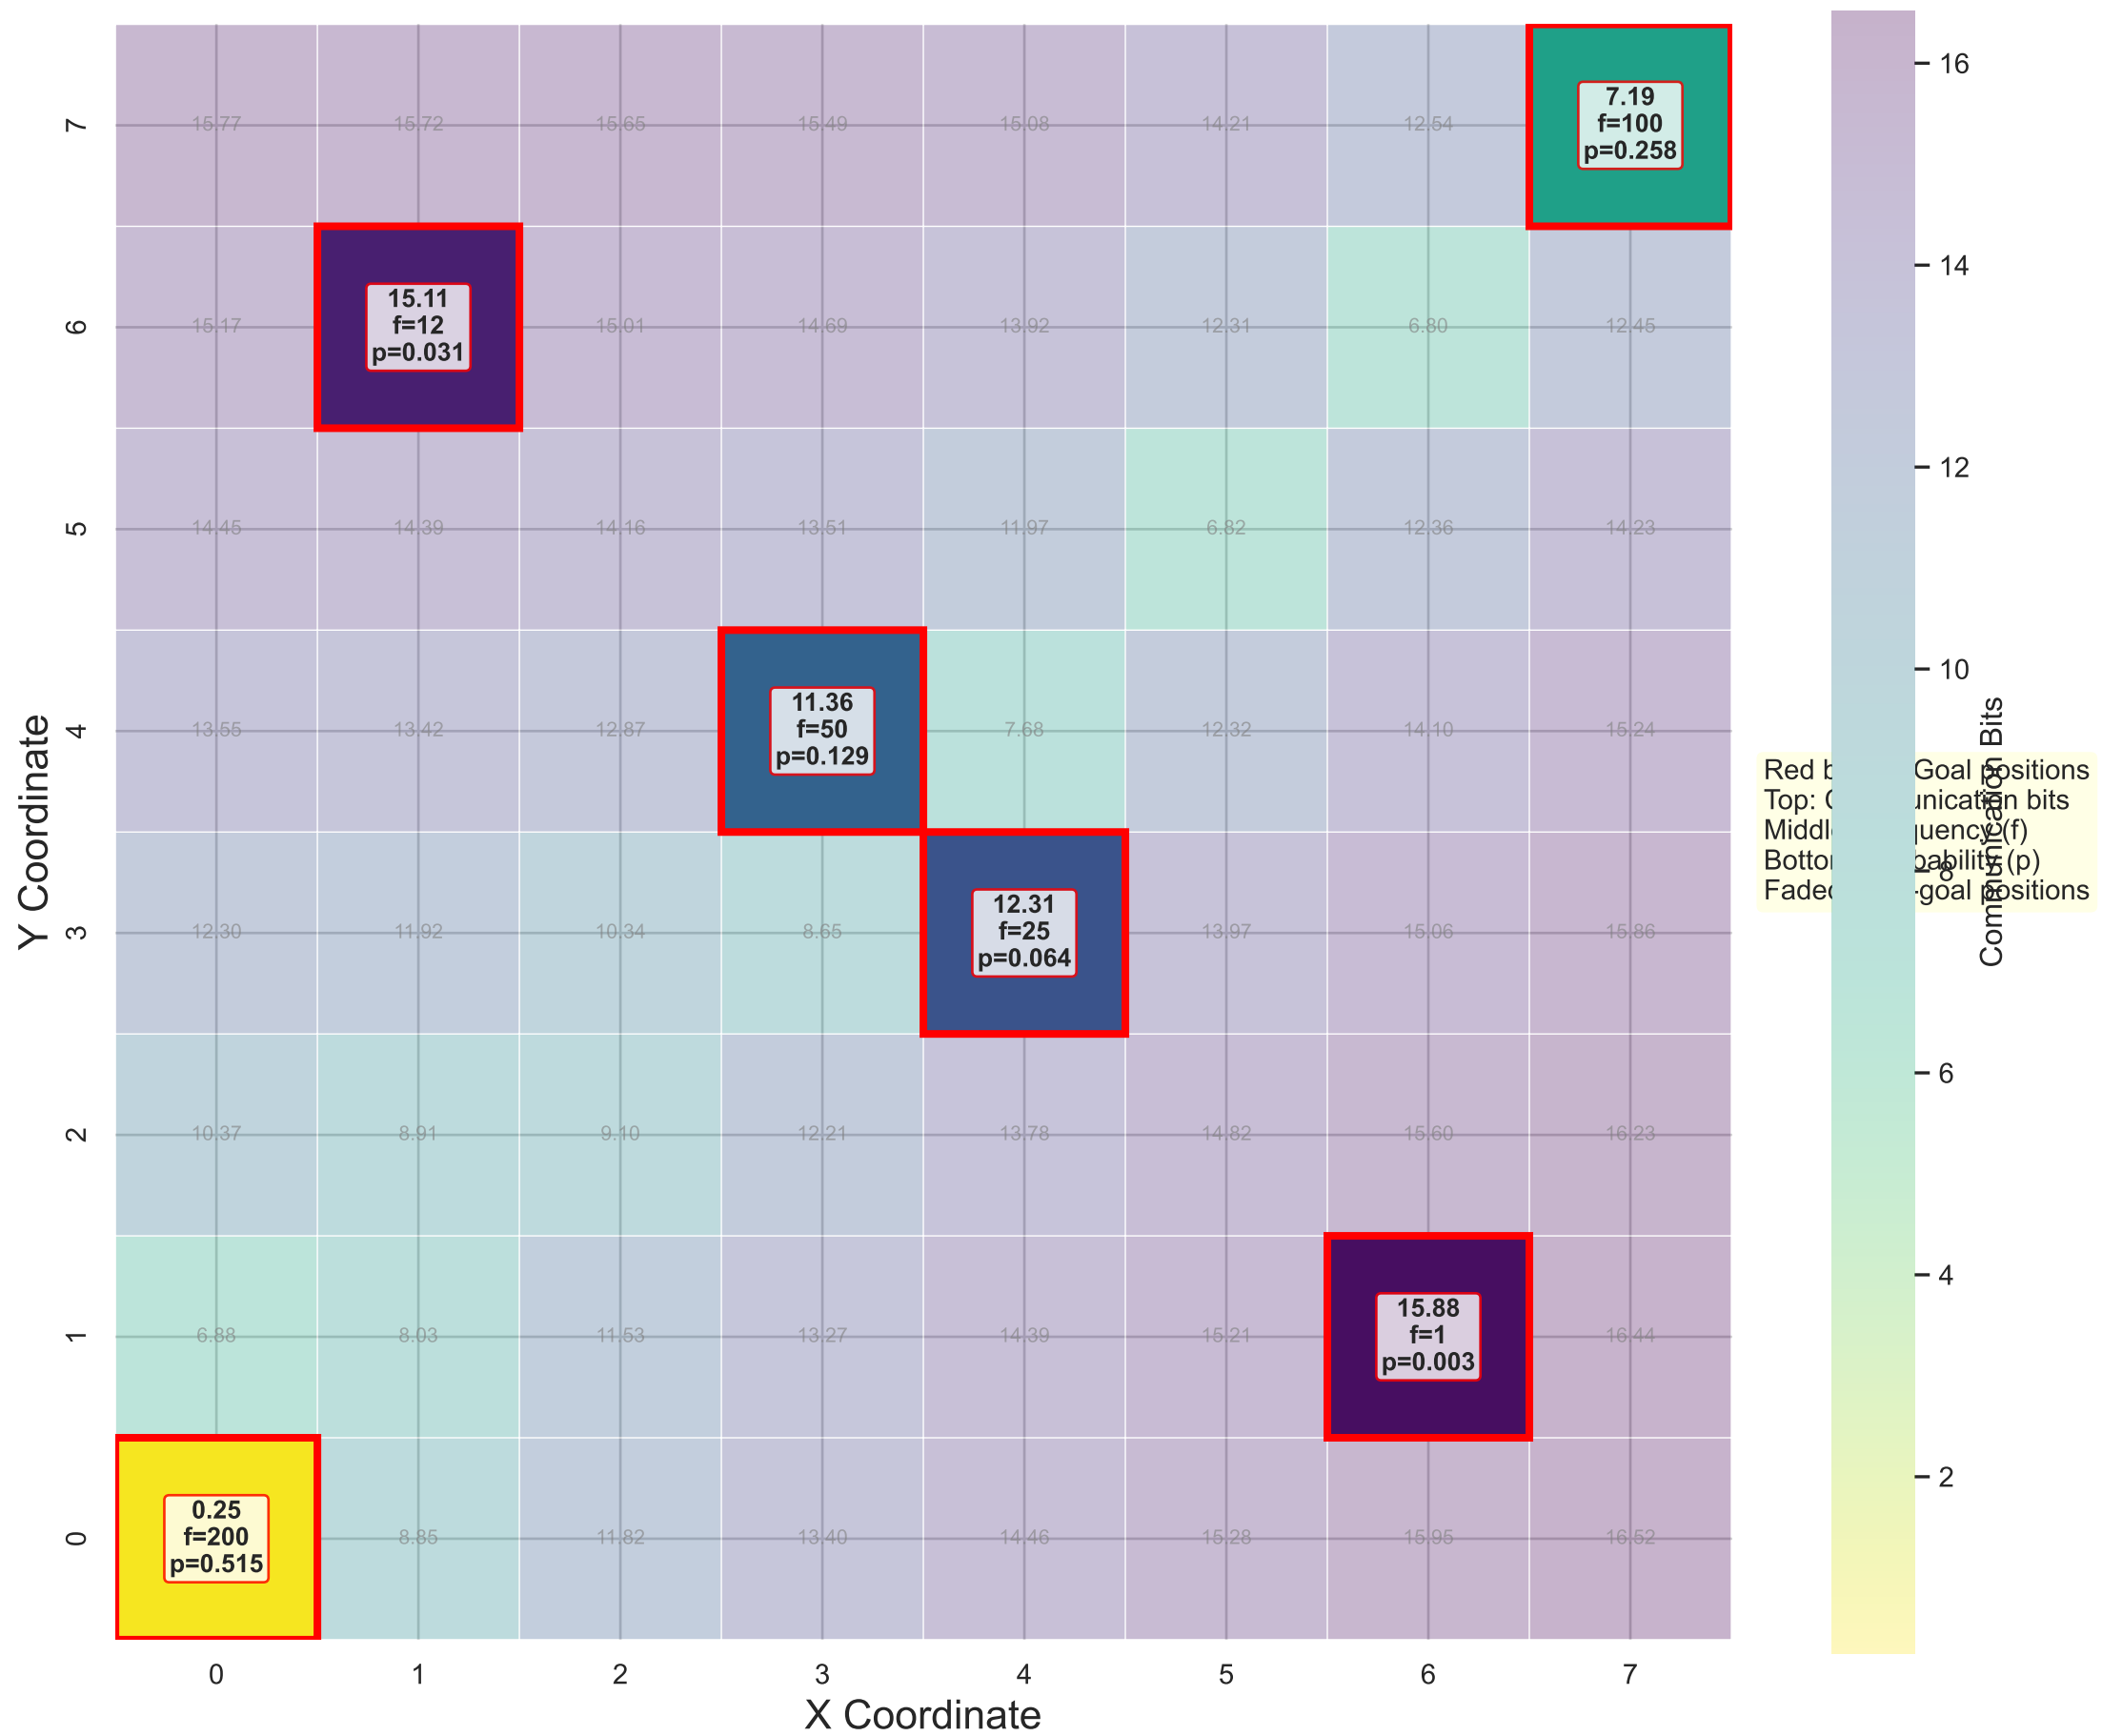

Supplement: supplementary_material [file communication_bits_heatmap.pdf › Multi-Agent-Limited-Comms/ToyProblem/communication_bits_heatmap.pdf]

(a) Task Performance & Communication Rate vs Penalty

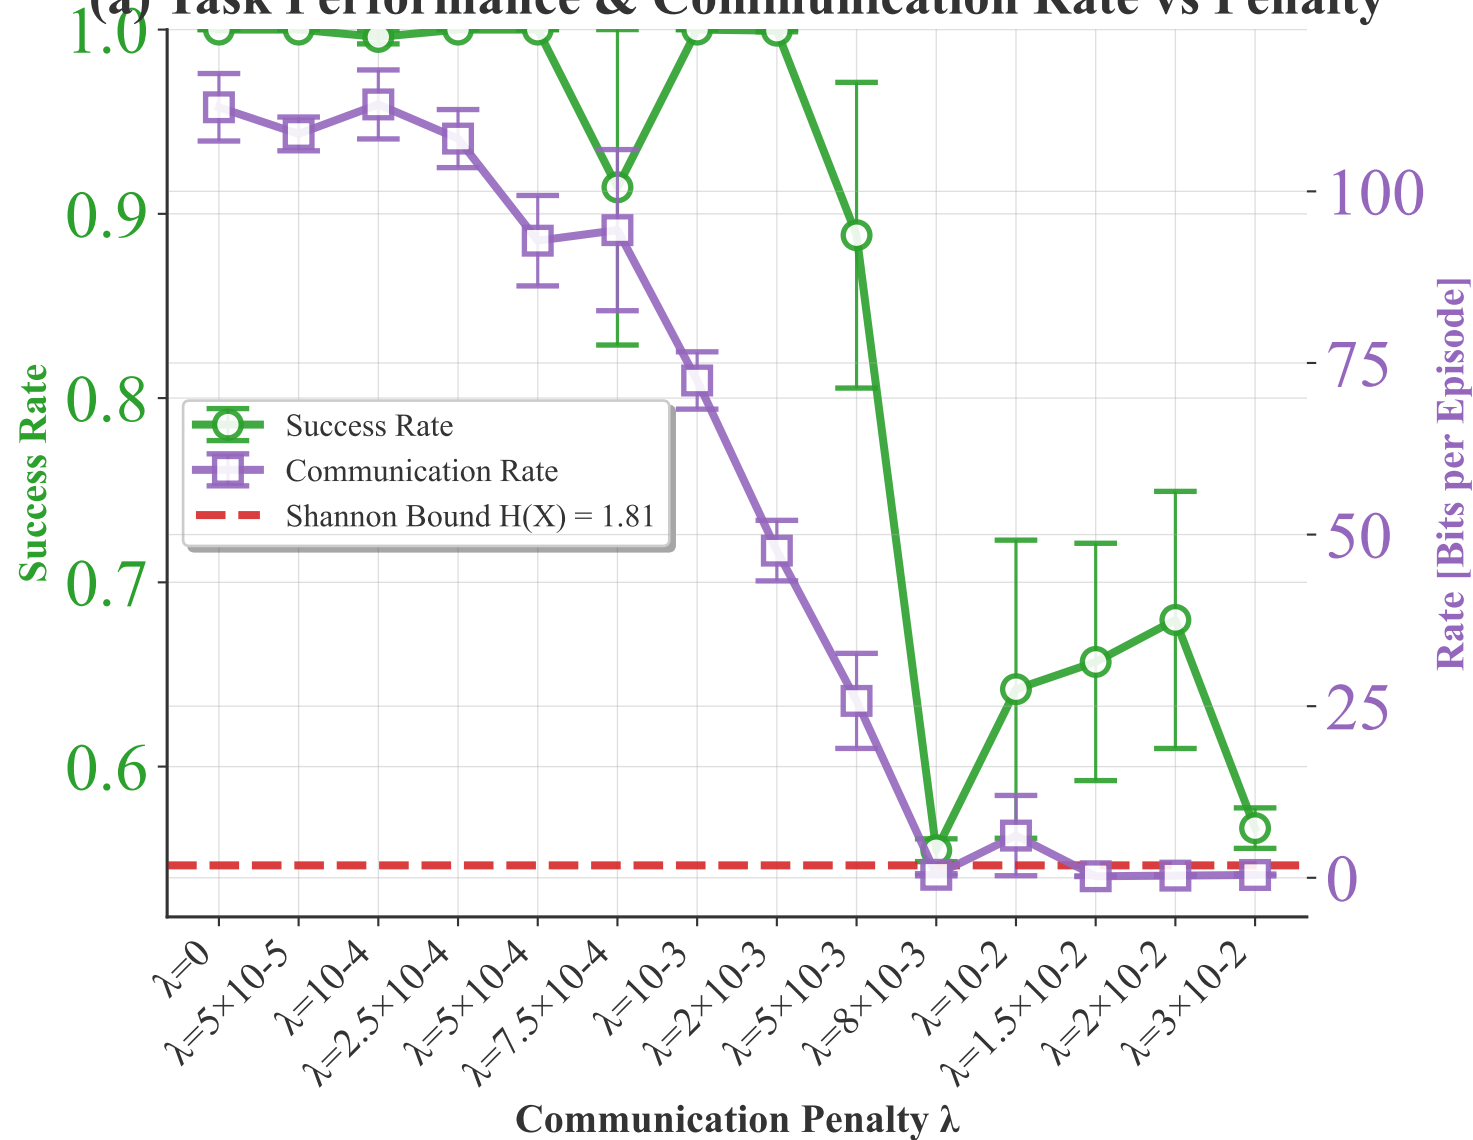

(b) Communication Efficiency Gap

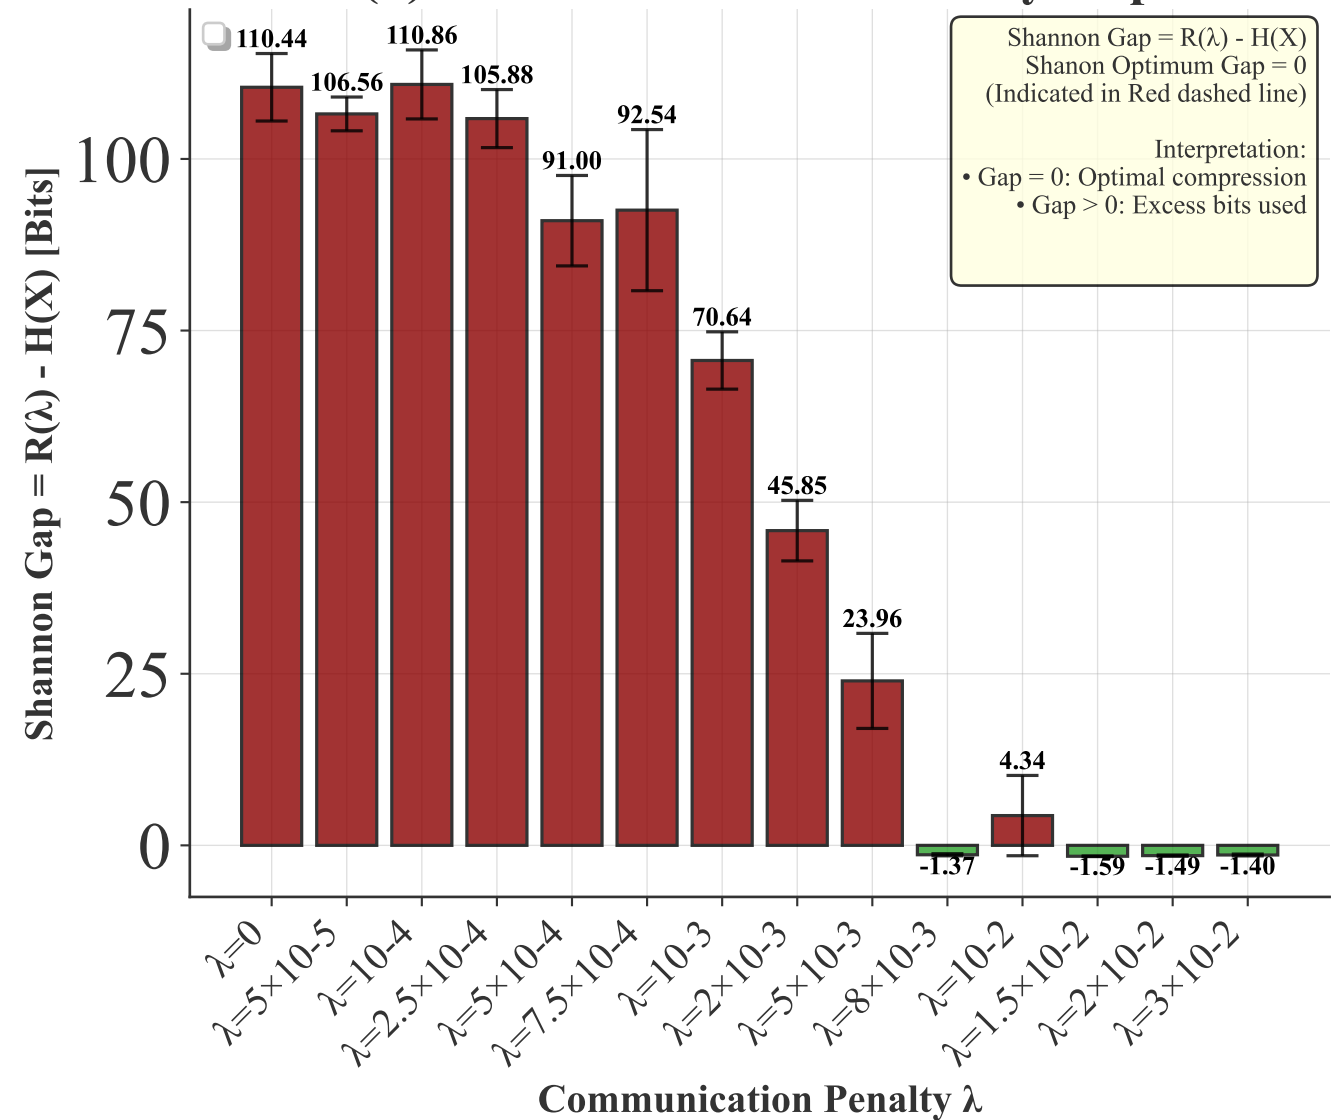

Supplement: supplementary_material [file performance_analysis_enhanced.pdf › Multi-Agent-Limited-Comms/ToyProblem/rate_distortion_results/performance_analysis_enhanced.pdf]

# Rate-Distortion Analysis: Multi-Agent Communication Efficiency

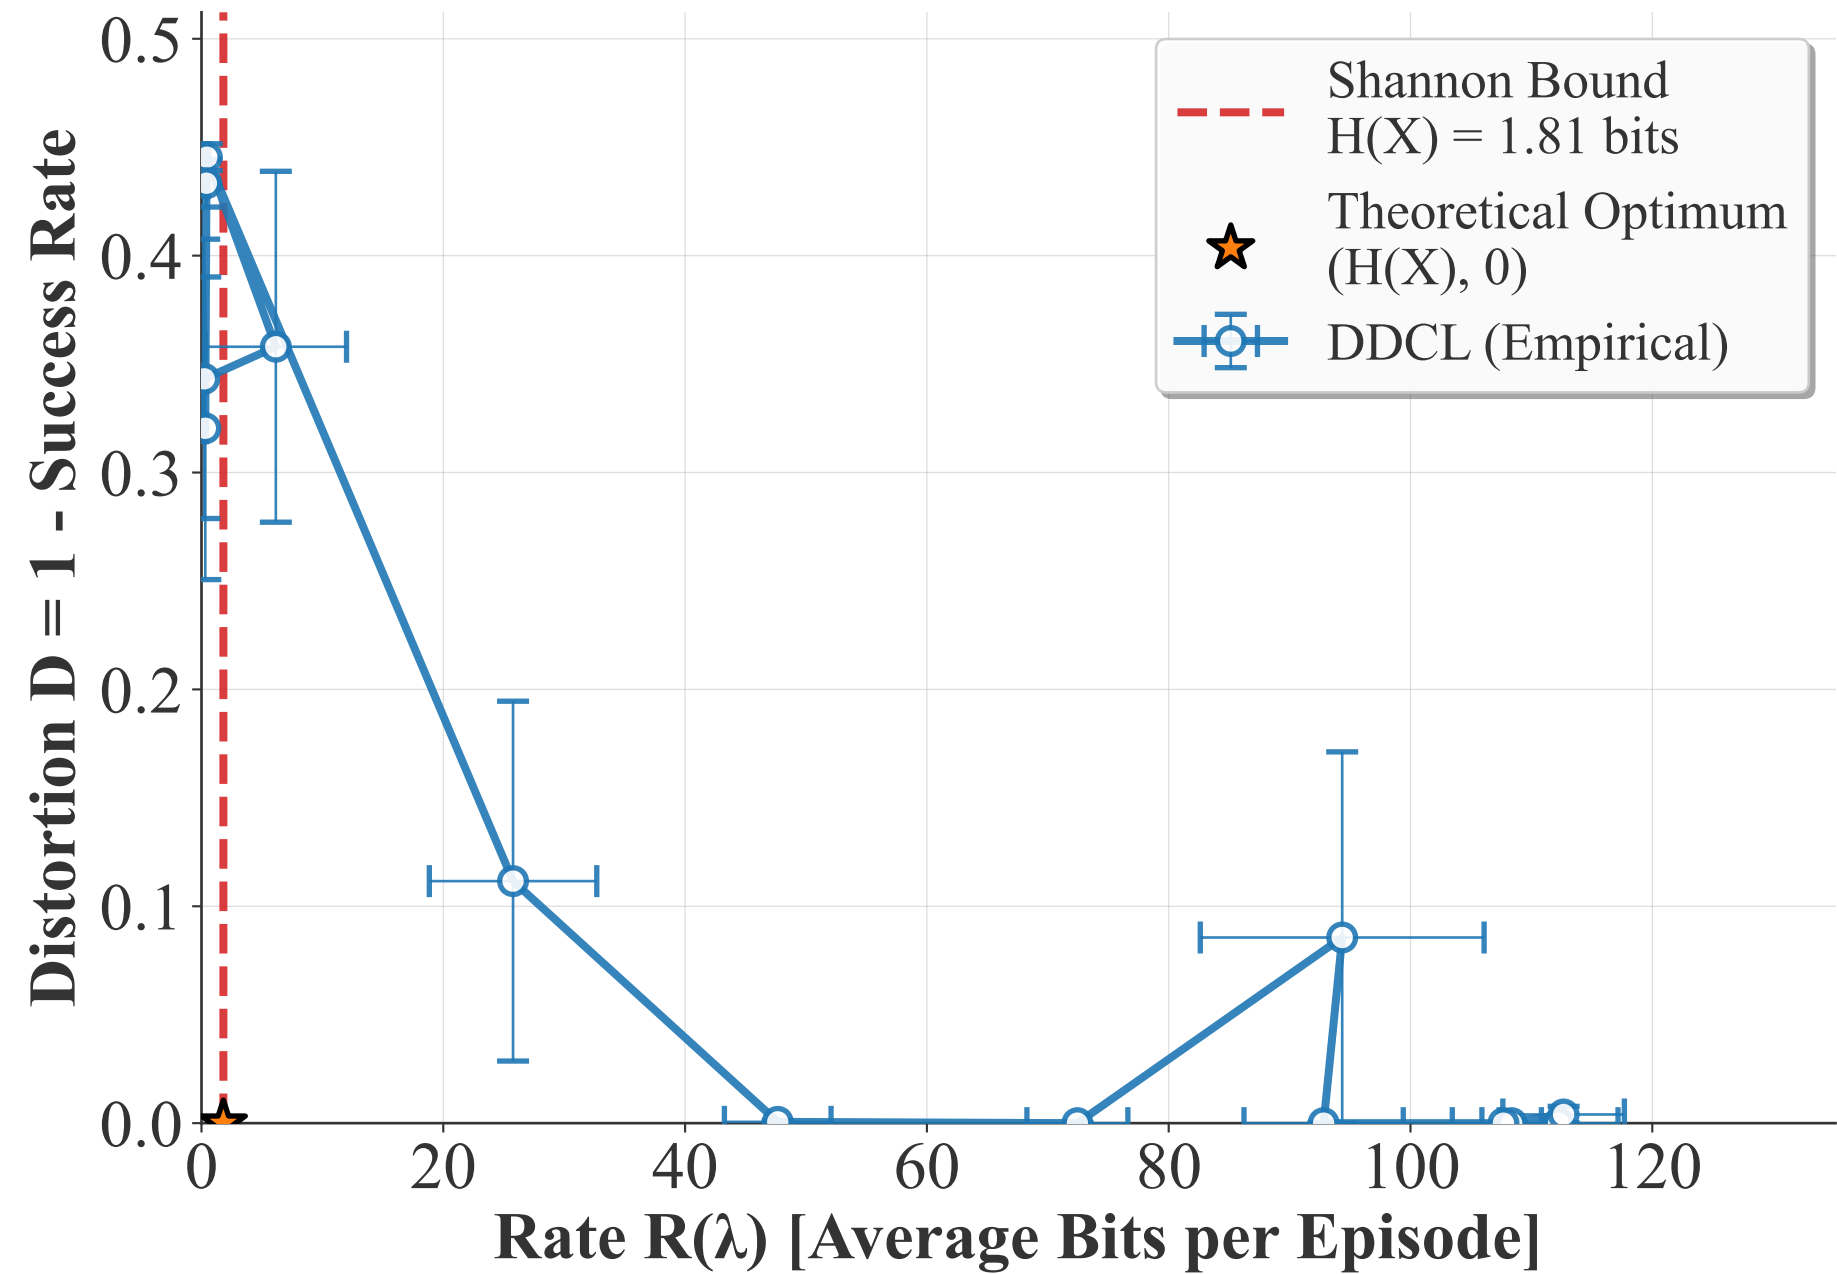

Supplement: supplementary_material [file rate_distortion_curve.pdf › Multi-Agent-Limited-Comms/ToyProblem/rate_distortion_results/rate_distortion_curve.pdf]

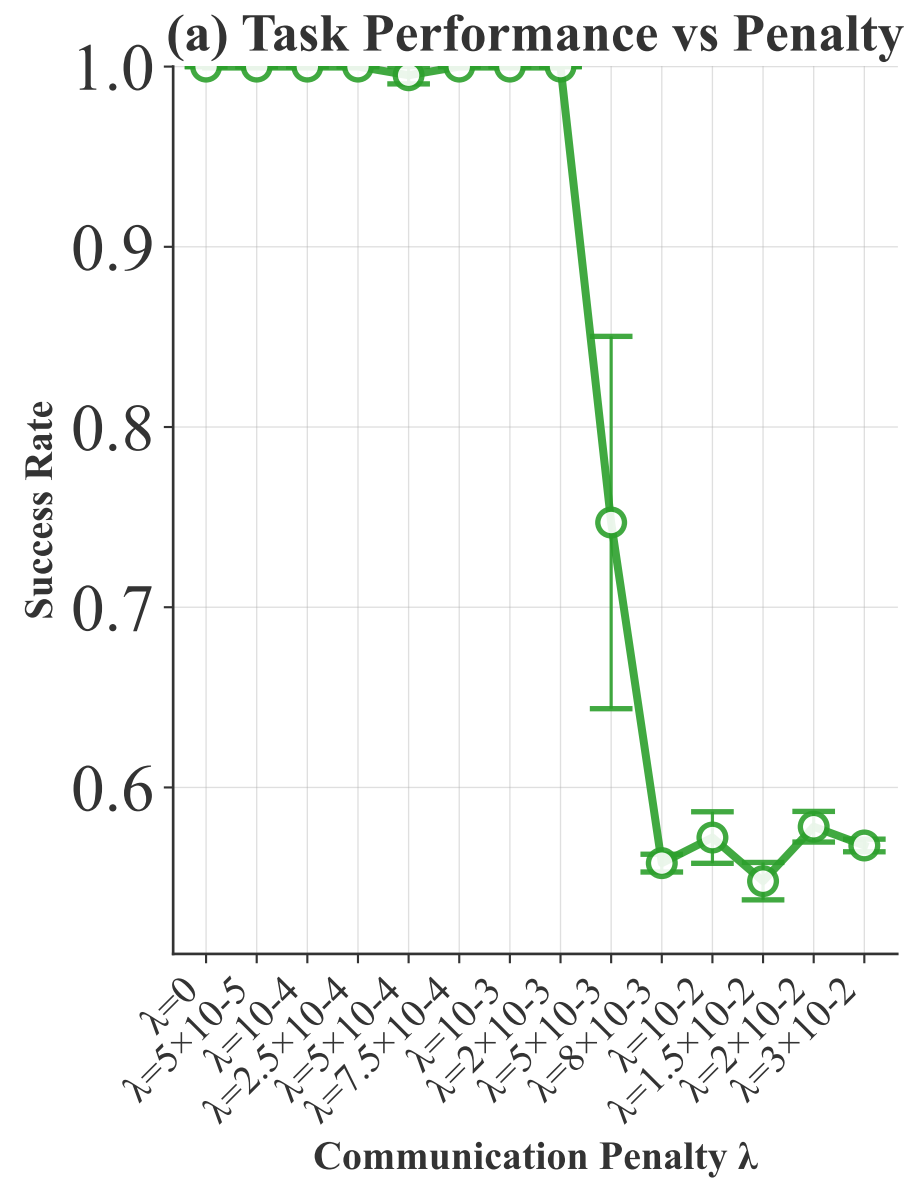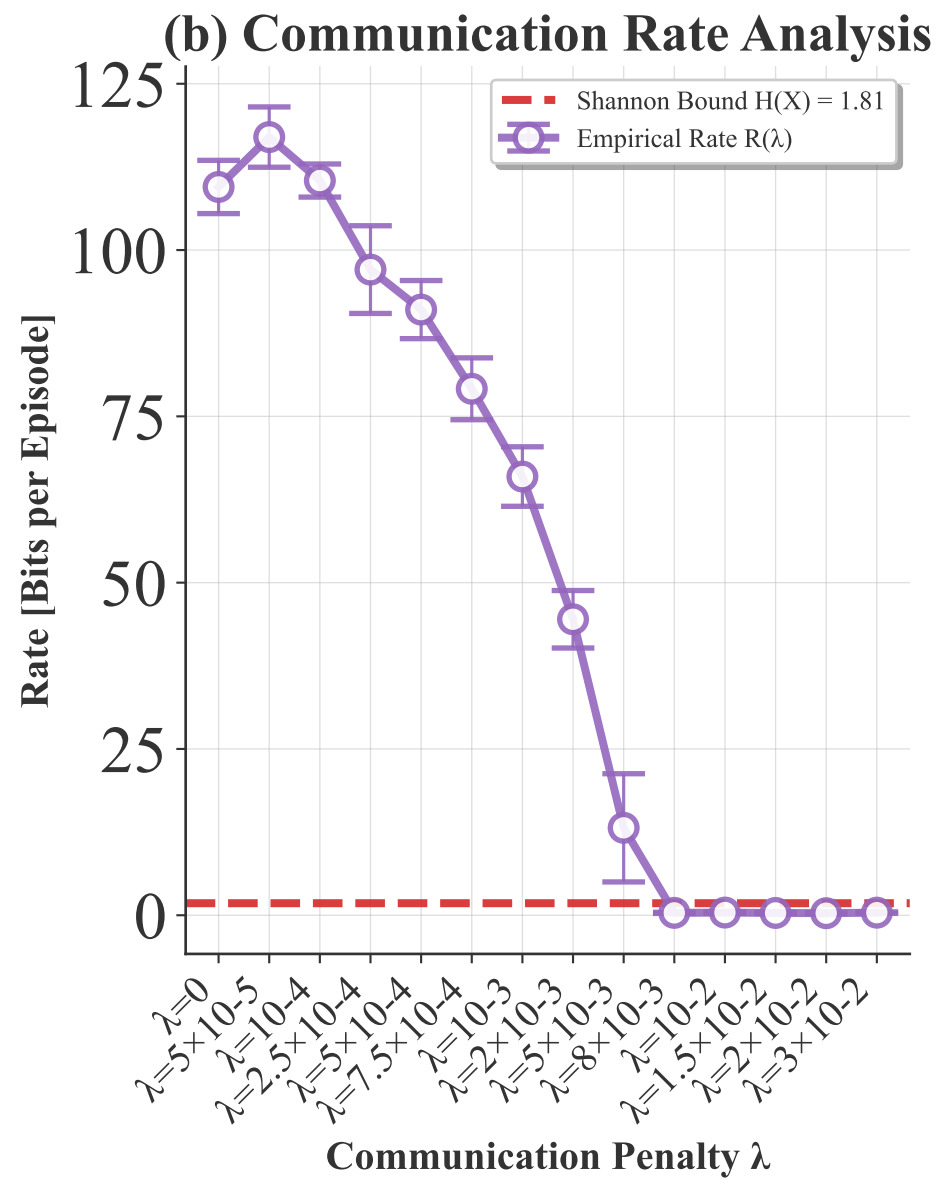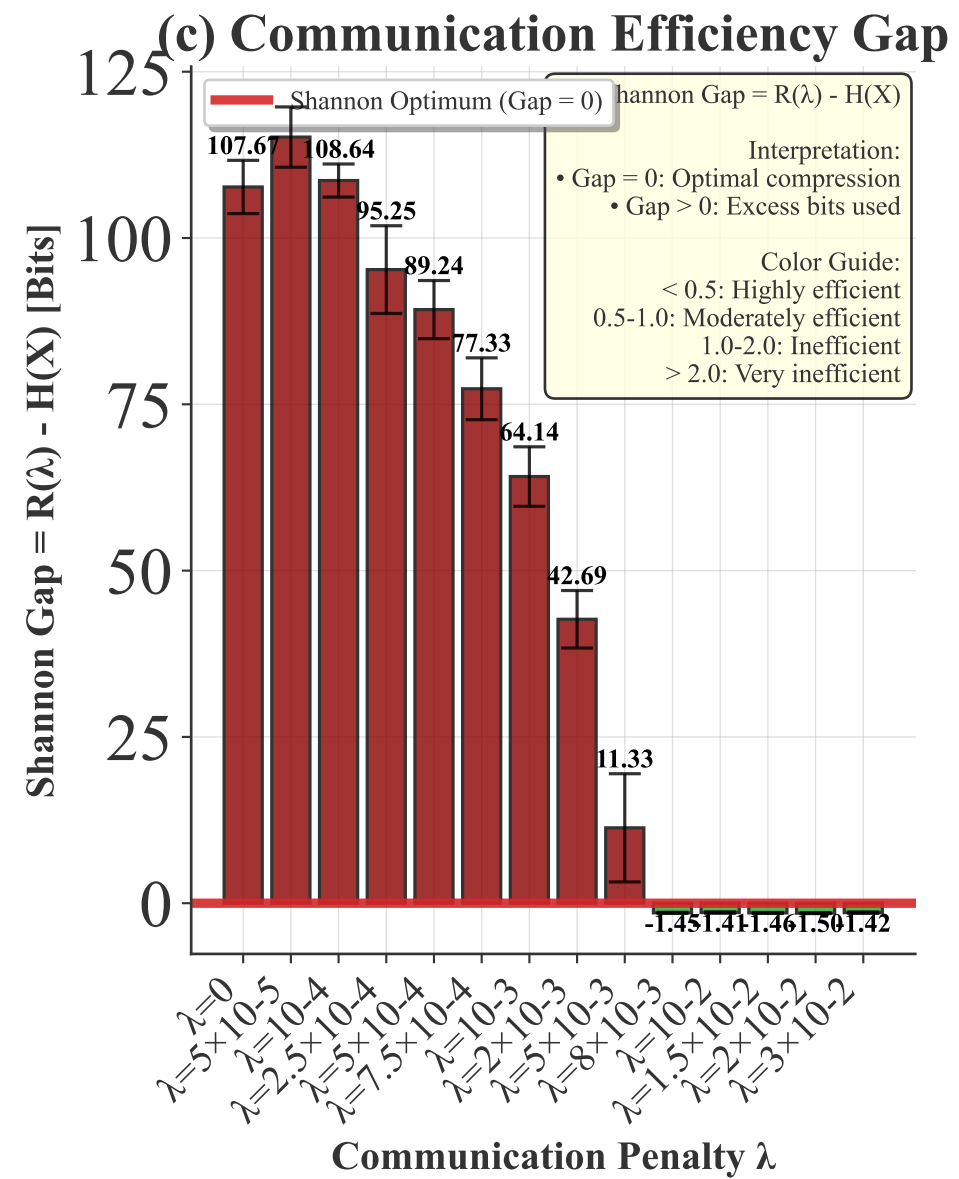

Supplement: supplementary_material [file performance_analysis_enhanced.pdf › Multi-Agent-Limited-Comms/ToyProblem/rate_distortion_results_old_v3/performance_analysis_enhanced.pdf]

# Rate-Distortion Analysis: Multi-Agent Communication Efficiency

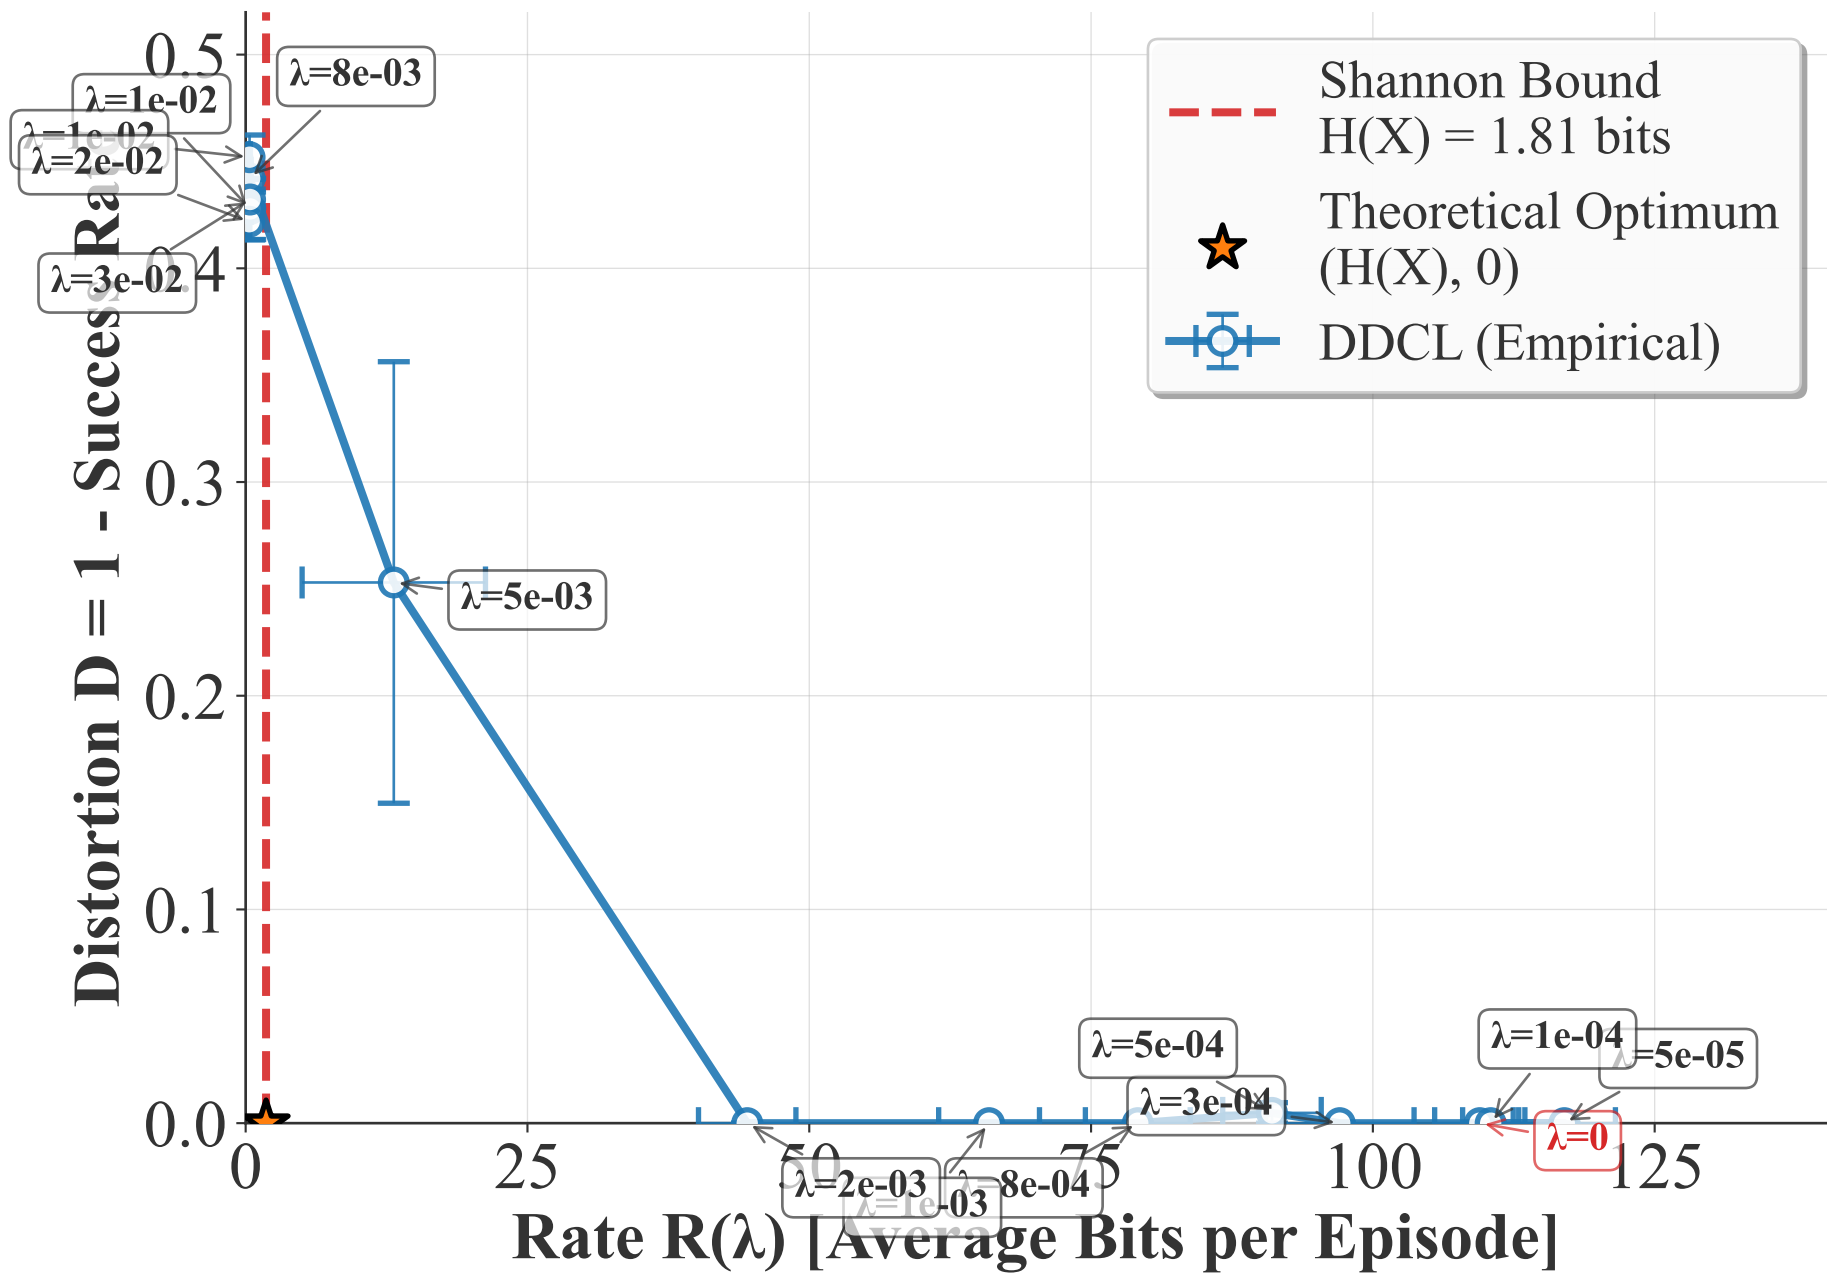

Supplement: supplementary_material [file rate_distortion_curve.pdf › Multi-Agent-Limited-Comms/ToyProblem/rate_distortion_results_old_v3/rate_distortion_curve.pdf]
